# Supplementary material
Source: PubMed Central journal article supplement (PMC2570191)
Supplement: NIHMS68202-supplement-01.pdf [file NIHMS68202-supplement-01.pdf]

## SUPPLEMENTARY MATERIAL

### Supplement A: Extended FAST (eFAST) details

#### *Supplement A.1: Choice of sinusoidal function form and choice of frequencies*

In eFAST, partitioning of variance is achieved by encoding the identity of input factors in the frequency of their variation. As explained in the text, the sampling procedure implemented in eFAST defines a sinusoidal function for each input parameter,  $x = f(N_S)$ , that assigns a value to  $x$  based on the number of samples per parameter ( $N_S$ ).

Aside from the requirement that the defining function be sinusoidal, the exact form of function  $f$  depends on the sampling distribution desired for each parameter. Saltelli *et al.* (Saltelli *et al.*, 1999) detail several forms of function  $f$  that result in different parameter distributions (i.e. pdfs).

The frequency of each sinusoidal function  $f$  is critical, as this frequency is used as a parameter identifier to partition variance in later algorithm steps. Frequencies (and their first few harmonics) must be less than the Nyquist critical frequency to avoid aliasing effects. The Nyquist-Shannon sampling theorem defines the Nyquist critical frequency of any discretely sampled signal is equal to 1/2 the sampling frequency. Any frequency component in the signal that exceeds the Nyquist critical frequency is incorrectly aliased to a lower frequency during Fourier analysis. Frequencies must additionally be linearly independent to avoid interference (see (Saltelli *et al.*, 1999) and pages 186-187 of (Saltelli *et al.*, 2000) for details on the choice of frequencies). The collection of one-dimensional sinusoidal functions, one for each input parameter, defines a multi-dimensional search curve that explores many different parameter combinations.

*Supplement A.2: Differences between eFAST and original FAST*

The primary advantage of the eFAST method over the original FAST is the ability to estimate the total-order sensitivity index of each input parameter. The original FAST method assigns a unique frequency to each input parameter, and thus calculates the unique contribution of each parameter in determining the model output. This unique contribution is the first-order sensitivity index,  $S_i$ , as described in the text. To calculate the total-order sensitivity index of a given parameter  $i$ , the eFAST method instead varies  $i$  at a unique, high frequency, but all other parameters at low, not-necessarily unique frequencies. Both FAST and eFAST calculate the first-order  $S_i$  of parameter  $i$  by Fourier analysis, using its unique high frequency. In contrast to FAST, eFAST then calculates the summed sensitivity index of the entire complementary set of parameters (all parameters except  $i$ ). Thus, while FAST partitions variance to each parameter, eFAST partitions variance into two categories: variance due to the parameter of interest  $i$ , and variance due to all other parameters (the complementary set to  $i$ ). Any variance that remains unaccounted for is assumed to be due to non-linear interaction between the parameter of interest and other parameters. The total-order sensitivity index,  $S_{Ti}$ , is then the first-order  $S_i$  plus this remainder fraction of variance, or equivalently, 1 minus the first-order index of the complementary set of parameters:  $S_{Ti} = 1 - (s_{ci}^2 / s_{total}^2)$ . When re-sampling with different parameter search curves (as described above), sensitivity indices are calculated from the mean of re-sampled variances:  $S_i = \text{mean}(s_i^2) / \text{mean}(s_{total}^2)$ .

*Supplement A.3: Determining additivity of a model from eFAST indices*

If  $Y = f(X)$ ,  $X \in \mathbb{R}^k$ , then the model/function  $f$  is additive if  $Y = a_1X_1 + a_2X_2 + \dots + a_kX_k$  and there are no interactions between  $X_i$ . Additivity is a special case of linearity (with

respect to the parameters  $a_i$ ). If interactions between parameters matter in explaining the variability of  $Y$ , then the model  $f$  is not additive. Assuming non-correlated inputs, for additive models the following holds true

$$\sum_{i=1}^k S_i \approx 1 \quad (\text{A.1})$$

Each  $S_i$  delivers a direct measure for the portion of output variance generated by variance in parameter  $i$ , therefore all  $S_i$  should sum to 1. For non-additive models the interactions among the input quantities within the model have to be considered. Equation (A.1) may be used to validate the additivity of a model. Equivalently a comparison between  $S_i$  and  $S_{Ti}$  may lead to a conclusion regarding the additivity of models with non-correlated inputs, namely

$$\begin{aligned} S_{Ti} \approx S_i & \quad \text{ADDITIVE MODEL} \\ S_{Ti} > S_i & \quad \text{NON - ADDITIVE MODEL} \end{aligned} \quad (\text{A.2})$$

Note that equation (A.2) typically does not hold for dynamical systems, because even the simplest solution of an ordinary differential equation entails nonlinearities and interactions<sup>1</sup>.

*Supplement A.4: The total-order index,  $S_{Tdummy}$*

While the artifactually non-zero first-order index,  $S_{dummy}$ , likely derives from aliasing and interference effects, the assignment of a larger artificial value to the total-order index,  $S_{Tdummy}$ , is more complicated. As described in Section 3.3, eFAST estimates the total-order index from the variance unaccounted for after partitioning variance to the parameter of interest and the complementary set of parameters. The remaining variance is assumed

---

<sup>1</sup> An alternative way to check for model additivity is to compute the standard regression coefficient (SRC) (see pages 24-27 in Saltelli, A., Chan, K. & Scott, E. M. (2000). *Sensitivity analysis*. Wiley series in probability and statistics, Wiley, Chichester ; New York.), because  $S_i = (\text{SRC}_i)^2$  for additive models.

to be higher-order interactions between the parameter of interest,  $i$ , and other parameters. However, this assumption is imprecise, as interaction between other parameters, but not with the parameter of interest, is included in this remaining variance. For example, given a model with parameters  $i, j$ , and  $k$ , the total-order sensitivity index of parameter  $i$ ,  $S_{Ti}$ , is given by:

$$S_{Ti} = S_i + S_{ij} + S_{ik} + S_{ijk} \quad (\text{A.3})$$

The higher-order terms,  $S_{ij} + S_{ik} + S_{ijk}$ , are approximated by the remaining variance after first-order partitioning. However, this remaining variance includes the interaction between parameters  $j$  and  $k$ ,  $S_{jk}$ . Therefore, by approximating the higher-order interactions of  $i$  using the remaining variance, the interaction effect  $S_{jk}$  is inappropriately included in the total-order index.

*Supplement A.5: Conditions on the two-sample t-test for eFAST  $S_i$  and  $S_{Ti}$*

The two-sample t-test compares two distributions, respectively the first ( $S_i^j$ ) or total-order ( $S_{Ti}^j$ ) sensitivity indexes for the  $k$  inputs/parameters ( $j=1,2,\dots,N_R$ ) with the first or total-order sensitivity indexes of the dummy parameter (i.e. (i.e.,  $S_{dummy}^j$  or  $S_{T_{dummy}}^j$ ,  $j=1,2,\dots,N_R$ )). As described in Section 3.3, the first-order  $S_i^j$  is calculated for each *resampling* ( $N_R$ ) as a fraction of total variance:

$$S_i^j = (s_i^j)^2 / (s_{total}^j)^2, \quad j=1,2,\dots,N_R$$

while  $S_{Ti}$  is calculated as the remaining variance after the contribution of the complementary set,  $S_{c_i}$ , is removed:

$$S_{Ti} = 1 - S_{c_i}$$

The *two-sample t-test* implicitly assumes that

$$\text{mean} \left[ (s_i^j)^2 \right] / \text{mean} \left[ (s_{total}^j)^2 \right] \simeq \text{mean} \left[ (s_i^j)^2 / (s_{total}^j)^2 \right], \quad (\text{A.4})$$

$$i = 1, 2, \dots, k, \quad j = 1, 2, \dots, N_R$$

for the first order coefficients and

$$\text{mean} \left[ (s_{c_i}^j)^2 \right] / \text{mean} \left[ (s_{total}^j)^2 \right] \simeq \text{mean} \left[ (s_{c_i}^j)^2 / (s_{total}^j)^2 \right], \quad (\text{A.5})$$

$$i = 1, 2, \dots, k, \quad j = 1, 2, \dots, N_R$$

for the total order sensitivity coefficients.

Conditions (A.4) and (A.5) can fail due to a large difference in either total variances between different re-samplings ( $s_{total}^j$ , denominators in (A.4) and (A.5)) or in  $s_i^j$  between different resamples. There is no way to control this variability *a priori*. This lack of robustness often occurs because  $N_S$  (the number of samples per parameter per search curve) is too small: the two-sample t-test will likely discard significant  $S_i$  and  $S_{T_i}$ .

We suggest the following method to check for adequacy of the re-sampling. We define the two indexes:

$$\nabla S_i^j = \frac{\text{mean} \left[ (s_i^j)^2 \right] / \text{mean} \left[ (s_{total}^j)^2 \right]}{\text{mean} \left[ (s_i^j)^2 / (s_{total}^j)^2 \right]}, \quad i = 1, 2, \dots, k \text{ and } j = 1, 2, \dots, N_R \quad (\text{A.6})$$

$$\nabla S_{T_i}^j = \frac{\text{mean} \left[ (s_{c_i}^j)^2 \right] / \text{mean} \left[ (s_{total}^j)^2 \right]}{\text{mean} \left[ (s_{c_i}^j)^2 / (s_{total}^j)^2 \right]}, \quad i = 1, 2, \dots, k \text{ and } j = 1, 2, \dots, N_R. \quad (\text{A.7})$$

Coefficients of variation<sup>2</sup> are then calculated on the distributions of (A.6) and (A.7), i.e.

---

<sup>2</sup>(CV = (Standard Deviation)/(Mean) =  $\sigma/\mu$ )

$$CV_{\nabla S_i^j} = \frac{\sigma_{\nabla S_i^j}}{\mu_{\nabla S_i^j}} \quad \text{and} \quad CV_{\nabla S_{T_i}^j} = \frac{\sigma_{\nabla S_{T_i}^j}}{\mu_{\nabla S_{T_i}^j}}, \quad i = 1, 2, \dots, k \quad \text{and} \quad j = 1, 2, \dots, N_R \quad (\text{A.8})$$

Comparing the first and total order sensitivity indexes of the  $k$  inputs/parameters with the dummy can be informative, if  $CV_{\nabla S_i^j}$  and  $CV_{\nabla S_{T_i}^j}$  are not too large. We use a threshold of 0.2 and implement the following heuristic conditions

$$\begin{cases} CV_{\nabla S_i} < 0.2 \\ CV_{\nabla S_{T_i}} < 0.2 \end{cases}, \quad i = 1, 2, \dots, k \quad (\text{A.9})$$

Condition (A.9) allows for a variation of 20% around each average value for  $S_i$  and  $S_{T_i}$  across the  $N_R$  resamples). The threshold is a qualitative check on how much variability we allow with the  $S_i$  and  $S_{T_i}$  over different  $N_R$ .

If condition (A.9) is not satisfied for some parameters/inputs, the two-sample t-test results cannot be considered reliable for these parameters/inputs. A way to improve accuracy is to increase  $N_S$ . We implemented a Matlab function (given on website) to check for condition (A.9), where  $CV_{\nabla S_i}$  and  $CV_{\nabla S_{T_i}}$  ( $i = 1, 2, \dots, k$ ) are expressed as percentages for each parameter/input. Unfortunately, when the mean value is near zero (that is the case for many first-order sensitivity indexes  $S_i$ ), the coefficient of variation  $CV_{\nabla S_i}$  is sensitive to change in the standard deviation, limiting its usefulness.

### **Supplement B: Multiple testing corrections for PRCC and eFAST**

Multiple testing corrections adjust p-values derived from multiple statistical tests to correct for occurrence of spurious false positives. The incidence of false positives is proportional to the number of tests performed and the critical significance level (p-value threshold). The total number of statistical tests performed depends on the number of parameters varied and output variables analyzed, but multiple testing corrections are

particularly important when analyzing the output of a dynamical system over many time points. To perform a correction, the p-value of each sensitivity index is multiplied by a correction factor that is a function of the number of tests performed.

Several correction procedures are available. Bonferroni correction (see (Abdi, 2007) for a review) is the most stringent test, providing the most conservative approach to control for false positives. Benjamini and Hochberg False Discovery Rate (Benjamini & Hochberg, 1995) is less stringent and provides a good balance between discovery of statistically significant PRCCs and eFAST indexes and limitation of false positive occurrences. We implement both corrections in our Matlab function for calculating PRCC (see PRCC function online at <http://malthus.micro.med.umich.edu/lab/usanalysis.html>).

A multiple testing correction factor for eFAST is only dependent on  $N_R$  and not on  $N_S$  or  $k^3$ , and, since  $N_R$  is usually within the order of 5-10, there is no need for a correction factor (we use uncorrected p-values for significance testing in comparing eFAST  $S_i$  and  $S_{T_i}$  to the dummy).

If  $\lambda$  is the number of tests performed, the Bonferroni correction multiplies the p-value of each PRCC by  $\lambda$ , namely

$$\text{Corrected } p_i = \lambda p_i, i = 1, \dots, \lambda. \quad (\text{A.10})$$

If the corrected p-value is still below our threshold for significance, then the PRCC is significantly different from 0. Otherwise the PRCC will be considered not significant. For example, if we vary 30 parameters simultaneously in the LHS scheme and check for

---

<sup>3</sup> No statistic is known for eFAST sensitivity indexes

significant PRCCs for 5 outputs at 10 different time points, we are looking at a correction factor of  $\lambda = 1500$  (i.e.  $30 \times 5 \times 10$ )<sup>4</sup>.

The Benjamini and Hochberg False Discovery Rate method works in 2 steps. The p-values are first ranked, from the smallest to the largest. The largest p-value remains as is. The second largest p-value is multiplied by the total number of tests  $\lambda$  divided by its rank ( $\lambda - 1$ ). The third p-value is multiplied by  $\lambda$  divided by its rank ( $\lambda - 2$ ). The  $i^{\text{th}}$  largest p-value is then corrected as follows,

$$\text{Corrected } p_i = \left( \frac{\lambda}{\lambda - i + 1} \right) p_i, i = 2, \dots, N. \quad (\text{A.11})$$

### **Supplement C: Log-scale sampling**

If the size of the interval of variation for some parameter is large, values of the parameter in its outer ranges can be neglected during sampling. A way to prevent under-sampling is to sample on a log scale those parameters with large variations. Figure C.1 shows the effect of sampling two parameters,  $s$  and  $\mu_T$ , of the HIV ODE model described in section 4.2. Each point represents a combination of samples of  $s$  and  $\mu_T$  resulting from LHS scheme. Parameters  $s$  and  $\mu_T$  are uniformly sampled in  $[1e^{-2}, 50]$  and  $[1e^{-5}, 0.2]$ , respectively. To prevent under-sampling in the outer ranges, we apply LHS on a log scale if the ratio between the max and the min value of the interval is higher than  $10^3$  (this threshold is arbitrary). We didn't implement the same adjustment in eFAST.

Both  $s$  and  $\mu_T$  exceed this threshold. If a log scale sampling is applied, all regions of the parameter space are sampled at least once (Figure C.1 Panel C). That is not the case if a

---

<sup>4</sup> Equivalently, if the threshold for significance was 5%, the corrected threshold will be 0.000033 (i.e.,  $p/\lambda = 0.05/1500$ ). Each corrected p-value should fall below this new threshold to consider the PRCC significant.



linear scale is implemented: large portions of the parameters space are not sampled (Figure C.1, Panel A and B).

**Figure C.1**

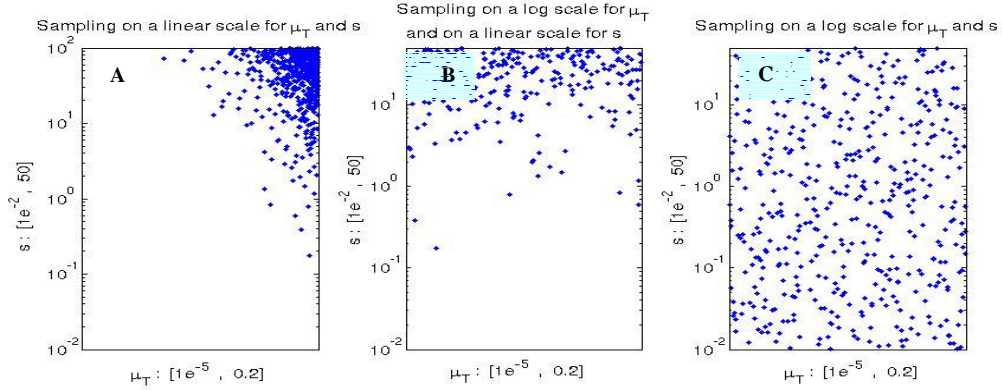

**Figure C.1:** Effect of sampling on linear and log scales in large intervals with a uniform pdf.

**Figure C.2**

LHS schemes for different sample sizes  $N$  applied to the model described by Eqs. (3)-(4)

in the main text.

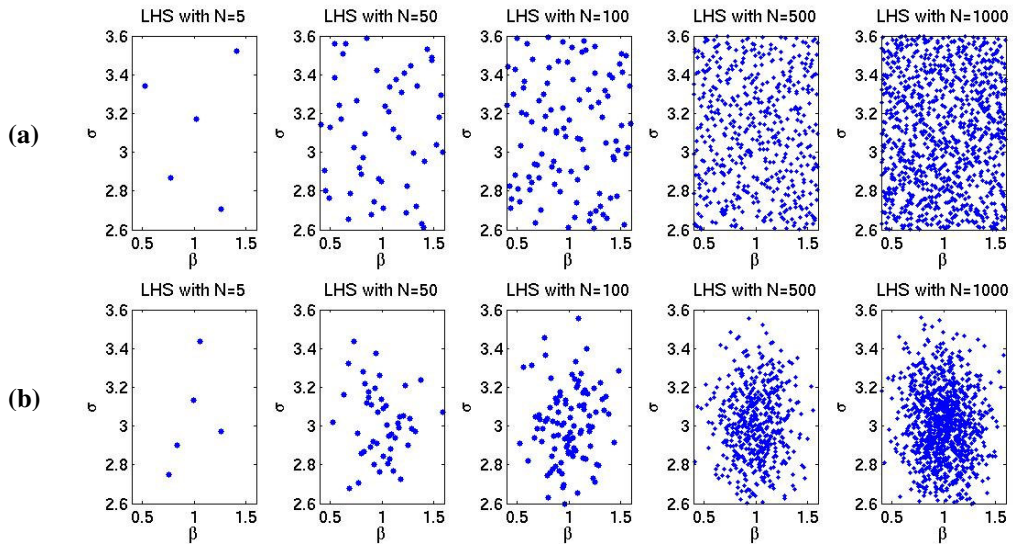

**Figure C.2:** LHS schemes for different sample sizes  $N$  applied to the model (3)-(4). Parameter  $\beta$  is represented on the abscissa while parameter  $\sigma$  is represented on the ordinate. The plots of row (a) are obtained by using uniform pdfs:  $\beta \in (0.4, 1.6)$  and  $\sigma \in (2.6, 3.6)$ . The plots of row (b) are obtained following Eq. (6) in the main text, namely  $\beta \sim Normal(1, 0.2)$  and  $\alpha \sim Normal(3, 0.2)$ .

## Supplement D: HIV model (Eqs. (15)-(18) in the main text) US analysis results

### PRCC results

**Table D.1:** PRCC results on the HIV-ODE model at 2 different time points (2000 and 4000 days post infection). Ranges for LHS are given in Table II (see main text). Panels A-F show the results for different sample sizes.

| <i>time</i> | <i>s</i> | $\mu_T$ | <i>r</i> | $k_1$   | $k_2$   | $\mu_b$ | $N_V$   | $\mu_V$  | <i>dummy</i> |
|-------------|----------|---------|----------|---------|---------|---------|---------|----------|--------------|
| 2000        | 0.1068   | -0.2490 | 0.1855   | 0.4473* | 0.6774* | -0.0923 | 0.7033* | -0.6461* | -0.0284      |
| 4000        | 0.0814   | -0.2336 | 0.1661   | 0.4281* | 0.6761* | -0.0570 | 0.7009* | -0.6489* | -0.0130      |

**Panel A:** NS=100

| <i>time</i> | <i>s</i> | $\mu_T$  | <i>r</i> | $k_1$   | $k_2$   | $\mu_b$ | $N_V$   | $\mu_V$  | <i>dummy</i> |
|-------------|----------|----------|----------|---------|---------|---------|---------|----------|--------------|
| 2000        | -0.1183  | -0.3303* | 0.0604   | 0.3374* | 0.7698* | 0.1621  | 0.7470* | -0.7529* | 0.0453       |
| 4000        | -0.0939  | -0.3306* | 0.0427   | 0.3266* | 0.7650* | 0.1470  | 0.7430* | -0.7517* | 0.0494       |

**Panel B:** NS=200

| <i>time</i> | <i>s</i> | $\mu_T$  | <i>r</i> | $k_1$   | $k_2$   | $\mu_b$ | $N_V$   | $\mu_V$  | <i>dummy</i> |
|-------------|----------|----------|----------|---------|---------|---------|---------|----------|--------------|
| 2000        | -0.0639  | -0.3017* | 0.0538   | 0.3981* | 0.7194* | -0.0084 | 0.7254* | -0.6910* | -0.0161      |
| 4000        | -0.0518  | -0.2992* | 0.0389   | 0.4076* | 0.7262* | -0.0163 | 0.7291* | -0.7064* | -0.0032      |

**Panel C:** NS=300

| <i>time</i> | <i>s</i> | $\mu_T$  | <i>r</i> | $k_1$   | $k_2$   | $\mu_b$ | $N_V$   | $\mu_V$  | <i>dummy</i> |
|-------------|----------|----------|----------|---------|---------|---------|---------|----------|--------------|
| 2000        | -0.0008  | -0.2665* | 0.1307*  | 0.3301* | 0.7093* | 0.0275  | 0.6945* | -0.6722* | -0.0366      |
| 4000        | -0.0082  | -0.2671* | 0.1247   | 0.3174* | 0.6992* | 0.0190  | 0.6929* | -0.6616* | -0.0490      |

**Panel D:** NS=400

| <i>time</i> | <i>s</i> | $\mu_T$  | <i>r</i> | $k_1$   | $k_2$   | $\mu_b$ | $N_V$   | $\mu_V$  | <i>dummy</i> |
|-------------|----------|----------|----------|---------|---------|---------|---------|----------|--------------|
| 2000        | 0.0561   | -0.2609* | 0.0882   | 0.2996* | 0.6772* | 0.0041  | 0.6540* | -0.6932* | -0.0446      |
| 4000        | 0.0627   | -0.2616* | 0.1012   | 0.2903* | 0.6708* | -0.0084 | 0.6443* | -0.6889* | -0.0480      |

**Panel E:** NS=500

| <i>time</i> | <i>s</i> | $\mu_T$  | <i>r</i> | $k_1$   | $k_2$   | $\mu_b$ | $N_V$   | $\mu_V$  | <i>dummy</i> |
|-------------|----------|----------|----------|---------|---------|---------|---------|----------|--------------|
| 2000        | 0.0778   | -0.3282* | 0.0297   | 0.3815* | 0.6702* | -0.0177 | 0.6763* | -0.6464* | 0.0101       |
| 4000        | 0.0692   | -0.3248* | 0.0322   | 0.3865* | 0.6739* | -0.0042 | 0.6824* | -0.6474* | 0.0148       |

**Panel F:** NS=1000

**Table D.2:** Top-Down Coefficient of Concordance (TDCC) for the PRCC results of Panels A-F in Table D.1.

| <i>N</i> | <i>TDCC</i> |          |
|----------|-------------|----------|
|          | t=2000      | t=4000   |
| 100-200  | 0.9169*     | 0.8987*  |
| 200-300  | 0.991**     | 0.9647** |
| 300-400  | 0.9795**    | 0.9558*  |
| 400-500  | 0.9899**    | 0.9899** |
| 500-1000 | 0.973**     | 0.973**  |

\*\* : p<0.01, \* : p<0.05

**Table D.3:** PRCC results on the HIV-ODE model at 2 different time points (2000 and 4000 days post infection). Ranges for LHS are given in Table II (see main text). Panels A-F show the results for different sample sizes. Sampling is performed using a log scale if max/min>1e3.

| <i>time</i>             | <i>s</i> | $\mu_T$  | <i>r</i> | $k_1$   | $k_2$    | $\mu_b$ | $N_V$   | $\mu_V$  | <i>dummy</i> |
|-------------------------|----------|----------|----------|---------|----------|---------|---------|----------|--------------|
| 2000                    | 0.1174   | -0.4045* | 0.1397   | 0.3132* | -0.0824  | 0.0794  | 0.3928* | -0.1826  | 0.1224       |
| 4000                    | 0.1127   | -0.5179* | 0.1527   | 0.2854* | -0.0805  | -0.1652 | 0.3357* | -0.2803* | 0.0298       |
| <b>Panel A: NS=100</b>  |          |          |          |         |          |         |         |          |              |
| <i>time</i>             | <i>s</i> | $\mu_T$  | <i>r</i> | $k_1$   | $k_2$    | $\mu_b$ | $N_V$   | $\mu_V$  | <i>dummy</i> |
| 2000                    | -0.054   | -0.3425* | 0.0329   | 0.5102* | -0.0886  | -0.0015 | 0.3909* | -0.2128* | -0.0180      |
| 4000                    | -0.065   | -0.3826* | -0.0495  | 0.4049* | 0.0427   | -0.0384 | 0.2555* | -0.1777* | -0.0955      |
| <b>Panel B: NS=200</b>  |          |          |          |         |          |         |         |          |              |
| <i>time</i>             | <i>s</i> | $\mu_T$  | <i>r</i> | $k_1$   | $k_2$    | $\mu_b$ | $N_V$   | $\mu_V$  | <i>dummy</i> |
| 2000                    | 0.0091   | -0.3071* | 0.0404   | 0.4230* | -0.1330  | 0.0299  | 0.3742* | -0.1663* | -0.0343      |
| 4000                    | 0.0183   | -0.4263* | -0.0042  | 0.3889* | -0.0427  | -0.0451 | 0.4019* | -0.2099* | -0.1210      |
| <b>Panel C: NS=300</b>  |          |          |          |         |          |         |         |          |              |
| <i>time</i>             | <i>s</i> | $\mu_T$  | <i>r</i> | $k_1$   | $k_2$    | $\mu_b$ | $N_V$   | $\mu_V$  | <i>dummy</i> |
| 2000                    | 0.0026   | -0.2481* | 0.0746   | 0.4135* | -0.1060  | -0.0000 | 0.3860* | -0.1793* | -0.0439      |
| 4000                    | 0.0354   | -0.3616* | 0.1604*  | 0.3962* | -0.1069  | 0.0133  | 0.3066* | -0.2564* | -0.0785      |
| <b>Panel D: NS=400</b>  |          |          |          |         |          |         |         |          |              |
| <i>time</i>             | <i>s</i> | $\mu_T$  | <i>r</i> | $k_1$   | $k_2$    | $\mu_b$ | $N_V$   | $\mu_V$  | <i>dummy</i> |
| 2000                    | 0.0874   | -0.3290* | -0.0084  | 0.4210* | -0.1739* | -0.0189 | 0.4139* | -0.1321* | -0.0216      |
| 4000                    | 0.0495   | -0.3874* | -0.0077  | 0.3958* | -0.0466  | -0.0214 | 0.4371* | -0.1928* | -0.0496      |
| <b>Panel E: NS=500</b>  |          |          |          |         |          |         |         |          |              |
| <i>time</i>             | <i>s</i> | $\mu_T$  | <i>r</i> | $k_1$   | $k_2$    | $\mu_b$ | $N_V$   | $\mu_V$  | <i>dummy</i> |
| 2000                    | 0.0160   | -0.2991* | 0.0286   | 0.4455* | -0.1394* | -0.0657 | 0.3650* | -0.2044* | -0.0399      |
| 4000                    | 0.0243   | -0.4052* | 0.0933*  | 0.3951* | -0.0334  | -0.0556 | 0.3384* | -0.1765* | 0.0059       |
| <b>Panel F: NS=1000</b> |          |          |          |         |          |         |         |          |              |

**Table D.4:** Top-Down Coefficient of Concordance (TDCC) for the PRCC results of Panels A-F in Table D.3.

| <i>N</i> | <i>TDCC</i> |         |
|----------|-------------|---------|
|          | t=2000      | t=4000  |
| 100-200  | 0.9728**    | 0.8621* |
| 200-300  | 0.9899**    | 0.9361* |
| 300-400  | 0.9935**    | 0.9513* |
| 400-500  | 0.9550*     | 0.9412* |
| 500-1000 | 0.9449*     | 0.8987* |

\*\* : p<0.01, \* : p<0.05

## eFAST results

**Table D.5:** eFAST  $S_i$  and  $S_{Ti}$  results on the HIV-ODE model at 2 different time points (2000 and 4000 days post infection). Ranges for LHS are given in Table II (see main text). Panels A-N show the results for different sample sizes.

| <i>time</i>                                                | <i>s</i> | $\mu_T$ | <i>r</i> | $k_1$   | $k_2$   | $\mu_b$ | $N_V$   | $\mu_V$ | <i>dummy</i> |
|------------------------------------------------------------|----------|---------|----------|---------|---------|---------|---------|---------|--------------|
| 2000                                                       | 0.0173   | 0.0350  | 0.0482   | 0.0455  | 0.0878* | 0.0383  | 0.1145* | 0.2676* | 0.0456       |
| 4000                                                       | 0.0173   | 0.0350  | 0.0481   | 0.0455  | 0.0877* | 0.0383  | 0.1145* | 0.2676* | 0.0456       |
| <b>Panel A: <math>S_i</math> [<math>N_S=65</math>]</b>     |          |         |          |         |         |         |         |         |              |
| <i>time</i>                                                | <i>s</i> | $\mu_T$ | <i>r</i> | $k_1$   | $k_2$   | $\mu_b$ | $N_V$   | $\mu_V$ | <i>dummy</i> |
| 2000                                                       | 0.3845   | 0.5007  | 0.5535   | 0.5158  | 0.6066* | 0.4600  | 0.7098  | 0.8538* | 0.5102       |
| 4000                                                       | 0.3845   | 0.5008  | 0.5536   | 0.5158  | 0.6067* | 0.4601  | 0.7098  | 0.8539* | 0.5102       |
| <b>Panel B: <math>S_{Ti}</math> [<math>N_S=65</math>]</b>  |          |         |          |         |         |         |         |         |              |
| <i>time</i>                                                | <i>s</i> | $\mu_T$ | <i>r</i> | $k_1$   | $k_2$   | $\mu_b$ | $N_V$   | $\mu_V$ | <i>dummy</i> |
| 2000                                                       | 0.0325   | 0.0127  | 0.0286   | 0.0293  | 0.0709* | 0.0173  | 0.0702* | 0.3271* | 0.0237       |
| 4000                                                       | 0.0325   | 0.0127  | 0.0285   | 0.0293  | 0.0709* | 0.0173  | 0.0702* | 0.3270* | 0.0237       |
| <b>Panel C: <math>S_i</math> [<math>N_S=129</math>]</b>    |          |         |          |         |         |         |         |         |              |
| <i>time</i>                                                | <i>s</i> | $\mu_T$ | <i>r</i> | $k_1$   | $k_2$   | $\mu_b$ | $N_V$   | $\mu_V$ | <i>dummy</i> |
| 2000                                                       | 0.5347   | 0.3488  | 0.4809   | 0.4766  | 0.5164  | 0.4239  | 0.5321  | 0.8339* | 0.4667       |
| 4000                                                       | 0.5348   | 0.3488  | 0.4809   | 0.4766  | 0.5164  | 0.4239  | 0.5321  | 0.8339* | 0.4667       |
| <b>Panel D: <math>S_{Ti}</math> [<math>N_S=129</math>]</b> |          |         |          |         |         |         |         |         |              |
| <i>time</i>                                                | <i>s</i> | $\mu_T$ | <i>r</i> | $k_1$   | $k_2$   | $\mu_b$ | $N_V$   | $\mu_V$ | <i>dummy</i> |
| 2000                                                       | 0.0150   | 0.0142  | 0.0284*  | 0.0242* | 0.0753* | 0.0229* | 0.0776* | 0.3232* | 0.0184       |
| 4000                                                       | 0.0150   | 0.0142  | 0.0284*  | 0.0240* | 0.0753* | 0.0229* | 0.0776* | 0.3232* | 0.0184       |
| <b>Panel E: <math>S_i</math> [<math>N_S=257</math>]</b>    |          |         |          |         |         |         |         |         |              |
| <i>time</i>                                                | <i>s</i> | $\mu_T$ | <i>r</i> | $k_1$   | $k_2$   | $\mu_b$ | $N_V$   | $\mu_V$ | <i>dummy</i> |
| 2000                                                       | 0.3969   | 0.3747  | 0.4872   | 0.4493  | 0.5579* | 0.4569  | 0.5734* | 0.8480* | 0.4222       |
| 4000                                                       | 0.3969   | 0.3747  | 0.4872   | 0.4482  | 0.5579* | 0.4569  | 0.5736* | 0.8480* | 0.4224       |
| <b>Panel F: <math>S_{Ti}</math> [<math>N_S=257</math>]</b> |          |         |          |         |         |         |         |         |              |
| <i>time</i>                                                | <i>s</i> | $\mu_T$ | <i>r</i> | $k_1$   | $k_2$   | $\mu_b$ | $N_V$   | $\mu_V$ | <i>dummy</i> |
| 2000                                                       | 0.0165   | 0.0232  | 0.0207   | 0.0171  | 0.0561* | 0.0180  | 0.0739* | 0.2796* | 0.0177       |
| 4000                                                       | 0.0165   | 0.0232  | 0.0207   | 0.0171  | 0.0561* | 0.0180  | 0.0739* | 0.2796* | 0.0178       |
| <b>Panel G: <math>S_i</math> [<math>N_S=513</math>]</b>    |          |         |          |         |         |         |         |         |              |
| <i>time</i>                                                | <i>s</i> | $\mu_T$ | <i>r</i> | $k_1$   | $k_2$   | $\mu_b$ | $N_V$   | $\mu_V$ | <i>dummy</i> |
| 2000                                                       | 0.4153   | 0.4600  | 0.4425   | 0.4323  | 0.4942  | 0.4443  | 0.6071* | 0.8302* | 0.4328       |
| 4000                                                       | 0.4154   | 0.4600  | 0.4426   | 0.4324  | 0.4943  | 0.4444  | 0.6071* | 0.8302* | 0.4330       |
| <b>Panel H: <math>S_{Ti}</math> [<math>N_S=513</math>]</b> |          |         |          |         |         |         |         |         |              |
| <i>time</i>                                                | <i>s</i> | $\mu_T$ | <i>r</i> | $k_1$   | $k_2$   | $\mu_b$ | $N_V$   | $\mu_V$ | <i>dummy</i> |
| 2000                                                       | 0.0018   | 0.0068* | 0.0043*  | 0.0026* | 0.0391* | 0.0014  | 0.0518* | 0.1280* | 0.0009       |
| 4000                                                       | 0.0018   | 0.0068* | 0.0043*  | 0.0026* | 0.0391* | 0.0014  | 0.0517* | 0.1282* | 0.0009       |
| <b>Panel I: <math>S_i</math> [<math>N_S=1025</math>]</b>   |          |         |          |         |         |         |         |         |              |

| <i>time</i> | <i>s</i> | $\mu_T$ | <i>r</i> | $k_1$  | $k_2$   | $\mu_b$ | $N_V$   | $\mu_V$ | <i>dummy</i> |
|-------------|----------|---------|----------|--------|---------|---------|---------|---------|--------------|
| 2000        | 0.4693   | 0.4686  | 0.4569   | 0.5047 | 0.5987* | 0.4665  | 0.5763* | 0.8551* | 0.4205       |
| 4000        | 0.4688   | 0.4687  | 0.4570   | 0.5047 | 0.5988* | 0.4665  | 0.5764* | 0.8551* | 0.4205       |

**Panel L:**  $S_{Ti}$  [ $N_S=1025$ ]

| <i>time</i> | <i>s</i> | $\mu_T$ | <i>r</i> | $k_1$  | $k_2$   | $\mu_b$ | $N_V$   | $\mu_V$ | <i>dummy</i> |
|-------------|----------|---------|----------|--------|---------|---------|---------|---------|--------------|
| 2000        | 0.0012   | 0.0042* | 0.0031*  | 0.0017 | 0.0352* | 0.0010  | 0.0487* | 0.1974* | 0.0005       |
| 4000        | 0.0012   | 0.0042* | 0.0031*  | 0.0017 | 0.0352* | 0.0010  | 0.0487* | 0.1975* | 0.0005       |

**Panel M:**  $S_i$  [ $N_S=2049$ ]

| <i>time</i> | <i>s</i> | $\mu_T$ | <i>r</i> | $k_1$  | $k_2$   | $\mu_b$ | $N_V$   | $\mu_V$ | <i>dummy</i> |
|-------------|----------|---------|----------|--------|---------|---------|---------|---------|--------------|
| 2000        | 0.4181   | 0.4308  | 0.4412   | 0.4603 | 0.5894* | 0.4568  | 0.5583* | 0.8445* | 0.4173       |
| 4000        | 0.4182   | 0.4309  | 0.4414   | 0.4603 | 0.5894* | 0.4569  | 0.5584* | 0.8445* | 0.4173       |

**Panel N:**  $S_{Ti}$  [ $N_S=2049$ ]

**Table D.6:** Coefficient of Variations described in Supplement A.5 for  $S_i$  and  $S_{Ti}$  results across the resamples ( $N_R$ ) on the HIV-ODE model at 2 different time points (2000 and 4000 days post infection). Panels A-N show the results for different sample sizes.

| <i>time</i> | <i>s</i> | $\mu_T$ | <i>r</i> | $k_1$   | $k_2$   | $\mu_b$  | $N_V$   | $\mu_V$ | <i>dummy</i> |
|-------------|----------|---------|----------|---------|---------|----------|---------|---------|--------------|
| 2000        | 27.6270  | 50.6562 | 85.8384  | 65.6931 | 40.4772 | 110.8997 | 55.5056 | 19.5493 | 50.7581      |
| 4000        | 27.6332  | 50.6821 | 85.8076  | 65.4197 | 40.3326 | 111.0496 | 55.5066 | 19.5538 | 50.8285      |

**Panel A:** Coefficients of Variation for  $S_i$  [ $N_S=65$ ]

| <i>time</i> | <i>s</i> | $\mu_T$ | <i>r</i> | $k_1$   | $k_2$   | $\mu_b$ | $N_V$   | $\mu_V$ | <i>dummy</i> |
|-------------|----------|---------|----------|---------|---------|---------|---------|---------|--------------|
| 2000        | 32.3344  | 18.9849 | 8.4448   | 14.4363 | 18.4949 | 15.7540 | 21.4101 | 5.3203  | 9.8655       |
| 4000        | 32.3339  | 18.9785 | 8.4263   | 14.4369 | 18.3964 | 15.7751 | 21.4030 | 5.3098  | 9.8863       |

**Panel B:** Coefficients of Variation for  $S_{Ti}$  [ $N_S=65$ ]

| <i>time</i> | <i>s</i> | $\mu_T$ | <i>r</i> | $k_1$   | $k_2$   | $\mu_b$ | $N_V$   | $\mu_V$ | <i>dummy</i> |
|-------------|----------|---------|----------|---------|---------|---------|---------|---------|--------------|
| 2000        | 66.4009  | 37.1084 | 47.1681  | 38.8312 | 42.9006 | 57.7603 | 20.8953 | 7.5438  | 68.7373      |
| 4000        | 66.4141  | 37.6689 | 47.0853  | 38.8305 | 42.8930 | 57.8376 | 20.8835 | 7.5592  | 68.6892      |

**Panel C:** Coefficients of Variation for  $S_i$  [ $N_S=129$ ]

| <i>time</i> | <i>s</i> | $\mu_T$ | <i>r</i> | $k_1$   | $k_2$   | $\mu_b$ | $N_V$   | $\mu_V$ | <i>dummy</i> |
|-------------|----------|---------|----------|---------|---------|---------|---------|---------|--------------|
| 2000        | 19.4592  | 33.4483 | 13.2410  | 17.4296 | 20.7016 | 20.5410 | 11.0773 | 3.1447  | 33.7744      |
| 4000        | 19.4569  | 33.6302 | 13.2481  | 17.4266 | 20.7030 | 20.5229 | 11.0739 | 3.1448  | 33.7709      |

**Panel D:** Coefficients of Variation for  $S_{Ti}$  [ $N_S=129$ ]

| <i>time</i> | <i>s</i> | $\mu_T$ | <i>r</i> | $k_1$   | $k_2$   | $\mu_b$ | $N_V$  | $\mu_V$ | <i>dummy</i> |
|-------------|----------|---------|----------|---------|---------|---------|--------|---------|--------------|
| 2000        | 75.6668  | 68.2531 | 10.8336  | 24.5938 | 15.5854 | 14.3132 | 3.1165 | 6.1560  | 15.3970      |
| 4000        | 75.4665  | 68.2950 | 10.9324  | 25.2706 | 15.6287 | 14.1029 | 3.0968 | 6.1630  | 15.4647      |

**Panel E:** Coefficients of Variation for  $S_i$  [ $N_S=257$ ]

| <i>time</i> | <i>s</i> | $\mu_T$ | <i>r</i> | $k_1$   | $k_2$   | $\mu_b$ | $N_V$  | $\mu_V$ | <i>dummy</i> |
|-------------|----------|---------|----------|---------|---------|---------|--------|---------|--------------|
| 2000        | 22.8305  | 23.2808 | 6.1407   | 11.2132 | 11.5687 | 10.4057 | 9.7493 | 2.7791  | 14.3156      |
| 4000        | 22.7958  | 23.2928 | 6.1285   | 11.4409 | 11.5712 | 10.3824 | 9.7243 | 2.7704  | 14.3153      |

**Panel F:** Coefficients of Variation for  $S_{Ti}$  [ $N_S=257$ ]

| <i>time</i> | <i>s</i> | $\mu_T$ | <i>r</i> | $k_1$  | $k_2$  | $\mu_b$ | $N$     | $\mu_V$ | <i>dummy</i> |
|-------------|----------|---------|----------|--------|--------|---------|---------|---------|--------------|
| 2000        | 29.6937  | 52.7933 | 46.3433  | 6.6893 | 5.4713 | 25.2698 | 14.1906 | 12.9174 | 17.6040      |
| 4000        | 29.8846  | 52.8598 | 46.4226  | 6.6961 | 5.4463 | 25.2115 | 14.1742 | 12.9181 | 17.4123      |

**Panel G:** Coefficients of Variation for  $S_i$  [ $N_S=513$ ]

| <i>time</i> | <i>s</i> | $\mu_T$ | <i>r</i> | $k_1$   | $k_2$  | $\mu_b$ | $N_V$  | $\mu_V$ | <i>dummy</i> |
|-------------|----------|---------|----------|---------|--------|---------|--------|---------|--------------|
| 2000        | 7.6933   | 15.6349 | 13.3265  | 14.7151 | 7.0411 | 8.4665  | 9.3695 | 1.2625  | 12.2550      |
| 4000        | 7.6836   | 15.6336 | 13.3108  | 14.7121 | 7.0351 | 8.4625  | 9.3634 | 1.2611  | 12.2753      |

**Panel H:** Coefficients of Variation for  $S_{Ti}$  [ $N_S=513$ ]

| <i>time</i> | <i>s</i> | $\mu_T$ | <i>r</i> | $k_1$   | $k_2$   | $\mu_b$ | $N_V$  | $\mu_V$ | <i>dummy</i> |
|-------------|----------|---------|----------|---------|---------|---------|--------|---------|--------------|
| 2000        | 44.7893  | 42.0246 | 15.8155  | 40.2886 | 25.0616 | 86.3381 | 7.9166 | 40.1370 | 38.4888      |
| 4000        | 44.4671  | 42.0021 | 15.4814  | 40.4222 | 25.0753 | 86.2653 | 7.9596 | 40.1090 | 38.6360      |

**Panel I:** Coefficients of Variation for  $S_i$  [ $N_S=1025$ ]

| <i>time</i> | <i>s</i> | $\mu_T$ | <i>r</i> | $k_1$   | $k_2$  | $\mu_b$ | $N_V$  | $\mu_V$ | <i>dummy</i> |
|-------------|----------|---------|----------|---------|--------|---------|--------|---------|--------------|
| 2000        | 11.9433  | 13.4549 | 3.0501   | 16.5545 | 5.9074 | 15.8635 | 4.0985 | 2.0700  | 8.6099       |
| 4000        | 11.8901  | 13.4592 | 3.0460   | 16.5575 | 5.8910 | 15.8596 | 4.0905 | 2.0663  | 8.6110       |

**Panel L:** Coefficients of Variation for  $S_{Ti}$  [ $N_S=1025$ ]

| <i>time</i> | <i>s</i> | $\mu_T$ | <i>r</i> | $k_1$   | $k_2$   | $\mu_b$ | $N_V$  | $\mu_V$ | <i>dummy</i> |
|-------------|----------|---------|----------|---------|---------|---------|--------|---------|--------------|
| 2000        | 74.8358  | 23.0827 | 39.6820  | 67.2312 | 22.1101 | 64.9453 | 9.6696 | 26.3278 | 25.0941      |
| 4000        | 75.3972  | 22.7410 | 39.4439  | 67.1669 | 22.1482 | 64.7345 | 9.6436 | 26.4074 | 25.0236      |

**Panel M:** Coefficients of Variation for  $S_i$  [ $N_S=2049$ ]

| <i>time</i> | <i>s</i> | $\mu_T$ | <i>r</i> | $k_1$  | $k_2$  | $\mu_b$ | $N_V$  | $\mu_V$ | <i>dummy</i> |
|-------------|----------|---------|----------|--------|--------|---------|--------|---------|--------------|
| 2000        | 7.1642   | 4.8226  | 3.4069   | 8.5539 | 6.4335 | 12.9741 | 2.4695 | 1.4821  | 4.6299       |
| 4000        | 7.1603   | 4.7716  | 3.3939   | 8.5593 | 6.4554 | 12.9718 | 2.4682 | 1.4784  | 4.6285       |

**Panel N:** Coefficients of Variation for  $S_{Ti}$  [ $N_S=2049$ ]

**Table D.7:** Top-Down Coefficient of Concordance (TDCC) for eFAST  $S_i$  and  $S_{Ti}$  results of Panels A-N in Table D.5 and D.6.

| <i>N</i>  | <i>TDCC - S<sub>i</sub></i> |         | <i>TDCC - S<sub>Ti</sub></i> |         |
|-----------|-----------------------------|---------|------------------------------|---------|
|           | t=2000                      | t=4000  | t=2000                       | t=4000  |
| 65-129    | 0.4239                      | 0.4239  | 0.2518                       | 0.2518  |
| 129-257   | 0.7906*                     | 0.7906* | 0.6922*                      | 0.6922* |
| 257-513   | 0.3882                      | 0.3882  | 0.4239                       | 0.4239  |
| 513-1025  | 0.5229                      | 0.5229  | 0.2290                       | 0.2290  |
| 1025-2049 | 1**                         | 1**     | 0.8121*                      | 0.8121* |

\*\* :  $p < 0.01$ , \* :  $p < 0.05$

## Supplement E: Two compartmental ODE model of *M. tuberculosis* infection

### Supplement E.1: Model description

To capture global dynamics of Mtb infection and immunity, we developed a two compartmental mathematical model (Marino & Kirschner, 2004; Marino *et al.*, 2004) that extended on a previous model (Wigginton & Kirschner, 2001) and that qualitatively and quantitatively addresses important processes of cellular priming and activation. These processes occur between the site of infection (lung) and the nearest draining lymph node (DLN) (see Figure E.1). The key cells mediating this process are the dendritic cells (DC). The ODE model describes the dynamics of macrophages (resting [MR], infected [MI] and activated [MA]), dendritic cells (immature [IDC] and mature [MDC]), lymphocytes (Naïve CD4+ T cells in the lymph node [T], Th0 in the lung [T0] and in the lymph node [T0LN], Th1 [T1] and Th2 [T2] in the lung), bacteria (intracellular [BI] and extracellular [BE]) and cytokines (IFN $\gamma$ , IL12 in the lung and in the lymph node [IL12LN], IL10 and IL4).

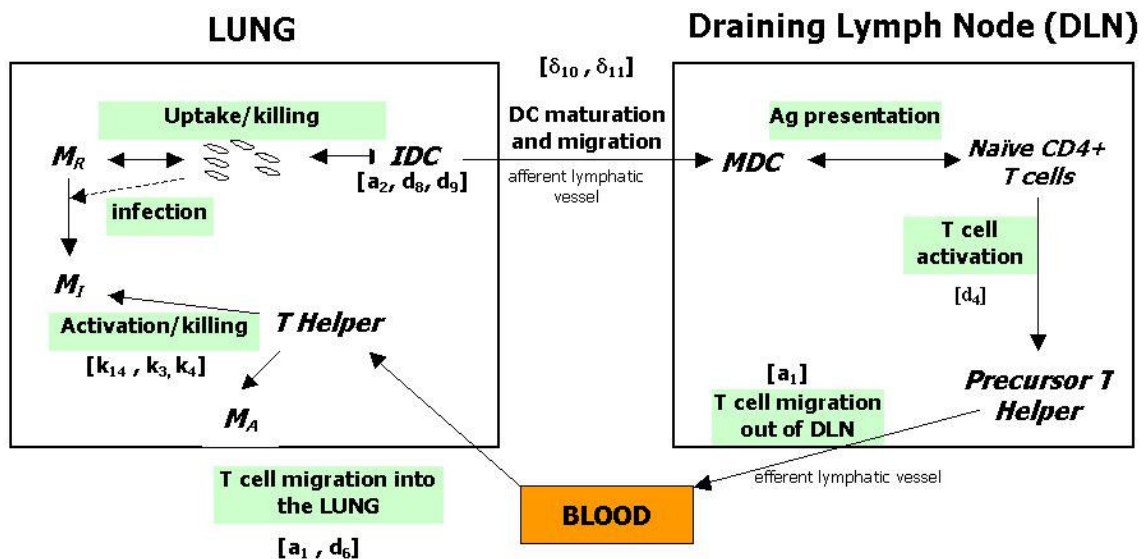

**Figure E.1:** diagram of the main processes (uptake, trafficking and presentation) described in the two compartmental ODE model of *M. tuberculosis* infection in humans.

During infection, macrophages are the prime target cells for Mtb. However, upon activation, macrophages can both kill intracellular bacteria and participate in a protective T helper cell type 1 (Th1) response (targeting intracellular bacteria). Immature or resting DCs (IDC) are present at sites of infection (such as the lung) at the onset of the inflammatory response: they are specialized for antigen uptake, processing and presentation. After bacterial uptake, immature DCs differentiate into the mature phenotype (mature DC or MDC) and migrate through the afferent lymphatic vessels into T cell area of the closest draining lymph node (DLN), where they perform two main functions: naive T cell recruitment and antigen presentation. Once presentation occurs, naive T cells experience stages of differentiation from naive to armed effector T cell. This phenotypic and functional change allows primed T cells to proliferate and migrate through the efferent lymphatic vessels into the blood, and eventually into the site of infection. As professional antigen presenting cells (APCs), dendritic cells play a major role in establishing an effective adaptive response.

**Table E.1**

**Table E.1:** parameter definitions and values of the two-compartmental model

| <i>Parameter</i> | <i>Description</i>                                                       | <i>Range</i>  |
|------------------|--------------------------------------------------------------------------|---------------|
| $\xi$            | fraction of Th0 migrating out of the DLN into the blood                  | [1e-4 , 1]    |
| $\delta_{10}$    | Max rate of IDC activation/maturation/migration from the lung to the DLN | [1e-4 , 1]    |
| $s_{IDC}$        | IDC baseline turnover in the lung                                        | [1 , 1e3]     |
| $k_2$            | Max infection rate of macrophages due to $B_E$                           | [1e-4 , 1]    |
| $k_3$            | Max activation rate of macrophages induced by $B_T$ and $IFN\gamma$      | [1e-3 , 1]    |
| $k_4$            | Max deactivation rate of macrophages induced by IL10                     | [1e-3 , 1]    |
| $k_{14}$         | Max rate of infected macrophage killing by T cells (apoptosis, CTL)      | [1e-3 , 1]    |
| $\delta_4$       | Rate of MDC-T cell interaction (antigen presentation, T cell activation) | [1e-7 , 1e-1] |
| $\delta_8$       | Mx rate of recruitment of IDC due to $B_E$                               | [1e-4 , 1e-1] |
| $\delta_6$       | Half saturation of Th0 migration from the LN due to $M_A$                | [1e3 , 1e5]   |
| $\delta_9$       | Half saturation of IDC recruitment due to $B_E$                          | [1e5 , 1e6]   |
| $\delta_{11}$    | Half saturation of IDC activation/maturation/migration due to $B_E$      | [1e3 , 1e5]   |



**Supplement E.2: Two compartmental model US analysis results**

**PRCC results**

| NS=100  |               |           |          |          |         |          |            |            |            |            |               |              |
|---------|---------------|-----------|----------|----------|---------|----------|------------|------------|------------|------------|---------------|--------------|
| BE      | =             |           |          |          |         |          |            |            |            |            |               |              |
| $\xi$   | $\delta_{10}$ | $s_{IDC}$ | $k_2$    | $k_3$    | $k_4$   | $k_{14}$ | $\delta_4$ | $\delta_8$ | $\delta_6$ | $\delta_9$ | $\delta_{11}$ | <i>dummy</i> |
| 0.0288  | -0.2527       | -0.2871*  | -0.1726  | 0.0174   | 0.1652  | -0.1503  | -0.0553    | -0.1187    | -0.0803    | 0.0287     | 0.0305        | -0.0575      |
| -0.1112 | 0.2113        | -0.5448*  | 0.8755*  | -0.4074* | 0.4129* | -0.3075* | -0.1265    | -0.0136    | -0.1145    | -0.0072    | 0.0565        | -0.0002      |
| -0.0329 | 0.5810*       | -0.3106*  | 0.7968*  | -0.5358* | 0.3557* | -0.2027  | -0.1959    | 0.0887     | -0.0061    | 0.0945     | 0.1024        | -0.0720      |
| MDC     |               |           |          |          |         |          |            |            |            |            |               |              |
| BE      | =             |           |          |          |         |          |            |            |            |            |               |              |
| $\xi$   | $\delta_{10}$ | $s_{IDC}$ | $k_2$    | $k_3$    | $k_4$   | $k_{14}$ | $\delta_4$ | $\delta_8$ | $\delta_6$ | $\delta_9$ | $\delta_{11}$ | <i>dummy</i> |
| -0.0473 | 0.9697*       | 0.7086*   | -0.5004* | 0.0350   | 0.0794  | -0.0129  | -0.0137    | -0.0564    | -0.0918    | 0.0258     | 0.1301        | 0.1428       |
| 0.0773  | 0.2145        | 0.7082*   | 0.5647*  | 0.0740   | 0.1069  | -0.1255  | -0.0906    | -0.0438    | -0.0005    | 0.1584     | 0.1483        | -0.1085      |
| 0.0644  | -0.2188       | 0.4983*   | 0.5502*  | -0.0295  | 0.2229  | -0.1491  | -0.1134    | -0.0024    | 0.0244     | 0.1249     | 0.2154        | -0.1403      |
| Th1     |               |           |          |          |         |          |            |            |            |            |               |              |
| BE      | =             |           |          |          |         |          |            |            |            |            |               |              |
| $\xi$   | $\delta_{10}$ | $s_{IDC}$ | $k_2$    | $k_3$    | $k_4$   | $k_{14}$ | $\delta_4$ | $\delta_8$ | $\delta_6$ | $\delta_9$ | $\delta_{11}$ | <i>dummy</i> |
| 0.8935* | 0.8926*       | 0.3152*   | 0.4978*  | 0.8546*  | 0.0645  | 0.0804   | 0.1441     | -0.0860    | 0.0599     | -0.0246    | -0.0957       | 0.1302       |
| 0.6717* | -0.1464       | 0.0647    | 0.4719*  | 0.6747*  | -0.2161 | -0.1560  | 0.0909     | -0.0204    | -0.0851    | -0.0418    | 0.1090        | -0.0357      |
| 0.6648* | -0.3083*      | -0.0530   | 0.0234   | 0.7082*  | -0.0317 | -0.2508* | 0.0848     | 0.0494     | -0.1420    | 0.0096     | 0.2379        | -0.1415      |
| NS=200  |               |           |          |          |         |          |            |            |            |            |               |              |
| BE      | =             |           |          |          |         |          |            |            |            |            |               |              |
| $\xi$   | $\delta_{10}$ | $s_{IDC}$ | $k_2$    | $k_3$    | $k_4$   | $k_{14}$ | $\delta_4$ | $\delta_8$ | $\delta_6$ | $\delta_9$ | $\delta_{11}$ | <i>dummy</i> |
| 0.0032  | 0.0476        | -0.0422   | -0.1835  | 0.0409   | 0.1739  | -0.1537  | -0.1484    | 0.0696     | -0.0286    | 0.0014     | -0.0926       | 0.0588       |
| 0.0411  | 0.3094*       | -0.4387*  | 0.8558*  | -0.4713* | 0.3707* | -0.1311  | -0.0488    | -0.0123    | 0.0164     | -0.0935    | -0.0569       | 0.0587       |
| 0.0533  | 0.5821*       | -0.4043*  | 0.6861*  | -0.4651* | 0.2717* | -0.0486  | -0.0221    | 0.0223     | 0.0469     | 0.0563     | -0.0787       | -0.0387      |
| MDC     |               |           |          |          |         |          |            |            |            |            |               |              |
| BE      | =             |           |          |          |         |          |            |            |            |            |               |              |
| $\xi$   | $\delta_{10}$ | $s_{IDC}$ | $k_2$    | $k_3$    | $k_4$   | $k_{14}$ | $\delta_4$ | $\delta_8$ | $\delta_6$ | $\delta_9$ | $\delta_{11}$ | <i>dummy</i> |
| -0.0307 | 0.9739*       | 0.7725*   | -0.5695* | -0.0116  | 0.1179  | -0.0499  | -0.0985    | 0.1782     | 0.0620     | 0.0361     | -0.2093       | 0.0434       |
| -0.0479 | 0.3963*       | 0.7519*   | 0.5351*  | -0.0070  | 0.0447  | -0.1630  | -0.0120    | -0.0261    | -0.0772    | 0.0295     | -0.0314       | 0.1033       |
| -0.1284 | -0.1303       | 0.5146*   | 0.5168*  | -0.1402  | 0.1082  | -0.0781  | -0.0161    | -0.0220    | -0.0470    | 0.0690     | 0.0532        | 0.1410       |
| Th1     |               |           |          |          |         |          |            |            |            |            |               |              |
| BE      | =             |           |          |          |         |          |            |            |            |            |               |              |
| $\xi$   | $\delta_{10}$ | $s_{IDC}$ | $k_2$    | $k_3$    | $k_4$   | $k_{14}$ | $\delta_4$ | $\delta_8$ | $\delta_6$ | $\delta_9$ | $\delta_{11}$ | <i>dummy</i> |
| 0.8828* | 0.9129*       | 0.4627*   | 0.4052*  | 0.8457*  | 0.1211  | -0.0848  | 0.0317     | 0.1352     | -0.0772    | -0.0621    | -0.1629       | -0.0199      |
| 0.4930* | 0.1820        | 0.1813    | 0.3929*  | 0.6039*  | -0.0679 | -0.1817  | -0.0828    | 0.0271     | -0.0418    | 0.0643     | -0.0398       | 0.1080       |
| 0.4967* | 0.0377        | 0.0284    | 0.0506   | 0.5652*  | -0.0310 | -0.1891* | -0.0646    | -0.0050    | -0.0535    | 0.0941     | -0.0055       | 0.1266       |

|          |               |           |          |          |          |          |            |            |            |            |               |              |
|----------|---------------|-----------|----------|----------|----------|----------|------------|------------|------------|------------|---------------|--------------|
| NS=300   |               |           |          |          |          |          |            |            |            |            |               |              |
| BE       | =             |           |          |          |          |          |            |            |            |            |               |              |
| $\xi$    | $\delta_{10}$ | $s_{IDC}$ | $k_2$    | $k_3$    | $k_4$    | $k_{14}$ | $\delta_4$ | $\delta_8$ | $\delta_6$ | $\delta_9$ | $\delta_{11}$ | <i>dummy</i> |
| 0.0978   | 0.9705*       | 0.7542*   | -0.5362* | 0.0569   | 0.1371   | -0.0484  | 0.0079     | -0.0590    | -0.0046    | 0.0170     | -0.0600       | -0.0862      |
| -0.0787  | 0.3343*       | 0.7292*   | 0.5789*  | -0.1841* | 0.1350   | -0.0528  | -0.0428    | -0.0364    | -0.0475    | 0.0638     | -0.0924       | -0.0666      |
| -0.1798* | -0.1636*      | 0.5515*   | 0.5634*  | -0.3815* | 0.1713   | -0.0521  | -0.0446    | 0.0015     | -0.0716    | 0.0446     | -0.0815       | -0.1135      |
| MDC      | =             |           |          |          |          |          |            |            |            |            |               |              |
| $\xi$    | $\delta_{10}$ | $s_{IDC}$ | $k_2$    | $k_3$    | $k_4$    | $k_{14}$ | $\delta_4$ | $\delta_8$ | $\delta_6$ | $\delta_9$ | $\delta_{11}$ | <i>dummy</i> |
| -0.0910  | 0.9734*       | 0.7598*   | -0.5324* | 0.0890   | -0.0896  | -0.0046  | -0.0923    | 0.0460     | 0.0202     | 0.0327     | -0.0864       | 0.0317       |
| -0.0581  | 0.3947*       | 0.7689*   | 0.5894*  | -0.0499  | -0.0166  | -0.1261  | -0.0186    | 0.0600     | 0.0502     | 0.0305     | -0.0204       | 0.0779       |
| -0.0325  | -0.0969       | 0.4821*   | 0.5090*  | -0.2422* | 0.1244   | -0.1788* | -0.0225    | 0.0391     | 0.0482     | -0.0397    | -0.0133       | 0.0601       |
| Th1      | =             |           |          |          |          |          |            |            |            |            |               |              |
| $\xi$    | $\delta_{10}$ | $s_{IDC}$ | $k_2$    | $k_3$    | $k_4$    | $k_{14}$ | $\delta_4$ | $\delta_8$ | $\delta_6$ | $\delta_9$ | $\delta_{11}$ | <i>dummy</i> |
| 0.8821*  | 0.8988*       | 0.3888*   | 0.4183*  | 0.8373*  | 0.0650   | -0.0418  | 0.1135     | -0.0490    | 0.0110     | 0.0307     | -0.0821       | -0.1077      |
| 0.5534*  | 0.0429        | 0.0760    | 0.3930*  | 0.5320*  | -0.0701  | -0.1083  | -0.0411    | -0.0554    | -0.1096    | 0.0732     | -0.0520       | -0.0175      |
| 0.4803*  | -0.1662*      | -0.0067   | 0.0062   | 0.4375*  | -0.0557  | -0.1299  | -0.0557    | -0.0699    | -0.0816    | 0.0492     | -0.0442       | -0.0239      |
| NS=400   |               |           |          |          |          |          |            |            |            |            |               |              |
| BE       | =             |           |          |          |          |          |            |            |            |            |               |              |
| $\xi$    | $\delta_{10}$ | $s_{IDC}$ | $k_2$    | $k_3$    | $k_4$    | $k_{14}$ | $\delta_4$ | $\delta_8$ | $\delta_6$ | $\delta_9$ | $\delta_{11}$ | <i>dummy</i> |
| 0.0672   | 0.1071        | -0.1235   | -0.1941* | -0.0483  | -0.1802* | 0.0327   | 0.0536     | 0.0076     | -0.1222*   | 0.0125     | 0.0037        | -0.0479      |
| 0.0142   | 0.2545*       | -0.4485*  | 0.8459*  | -0.5470* | 0.1379*  | -0.0838  | 0.0892     | 0.1296*    | -0.0349    | -0.0165    | 0.0032        | -0.0443      |
| -0.0272  | 0.4781*       | -0.3343*  | 0.6001*  | -0.4952* | 0.1454*  | -0.0686  | 0.0382     | 0.0603     | -0.0089    | 0.0368     | 0.0280        | -0.0413      |
| MDC      | =             |           |          |          |          |          |            |            |            |            |               |              |
| $\xi$    | $\delta_{10}$ | $s_{IDC}$ | $k_2$    | $k_3$    | $k_4$    | $k_{14}$ | $\delta_4$ | $\delta_8$ | $\delta_6$ | $\delta_9$ | $\delta_{11}$ | <i>dummy</i> |
| -0.0036  | 0.9717*       | 0.7328*   | -0.4922* | -0.0418  | -0.1095  | 0.0307   | 0.0233     | 0.0154     | -0.1027    | 0.0842     | -0.0637       | -0.0245      |
| 0.0985   | 0.3976*       | 0.7569*   | 0.6085*  | -0.1616* | -0.0604  | 0.0434   | 0.0008     | -0.0800    | -0.0076    | -0.0240    | 0.0573        | -0.0336      |
| 0.1015   | -0.1574*      | 0.5639*   | 0.5868*  | -0.2869* | 0.0108   | 0.0520   | -0.0105    | -0.0190    | -0.0140    | -0.0322    | 0.0161        | -0.0478      |
| Th1      | =             |           |          |          |          |          |            |            |            |            |               |              |
| $\xi$    | $\delta_{10}$ | $s_{IDC}$ | $k_2$    | $k_3$    | $k_4$    | $k_{14}$ | $\delta_4$ | $\delta_8$ | $\delta_6$ | $\delta_9$ | $\delta_{11}$ | <i>dummy</i> |
| 0.8751*  | 0.9012*       | 0.3870*   | 0.4323*  | 0.8179*  | -0.1204  | 0.0348   | 0.1054     | -0.0128    | -0.0987    | -0.0160    | -0.0437       | -0.0304      |
| 0.5752*  | 0.1257        | 0.1656*   | 0.3969*  | 0.5593*  | -0.3174* | 0.0166   | 0.0148     | 0.0138     | -0.0572    | 0.0070     | 0.0322        | -0.0791      |
| 0.5925*  | -0.0649       | 0.0567    | -0.0065  | 0.5235*  | -0.2865* | -0.0384  | 0.0041     | -0.0424    | -0.0460    | -0.0279    | 0.0334        | -0.1135      |

|          |               |           |          |          |          |          |            |            |            |            |               |              |
|----------|---------------|-----------|----------|----------|----------|----------|------------|------------|------------|------------|---------------|--------------|
| NS=500   |               |           |          |          |          |          |            |            |            |            |               |              |
| BE       | =             |           |          |          |          |          |            |            |            |            |               |              |
| $\xi$    | $\delta_{10}$ | $s_{IDC}$ | $k_2$    | $k_3$    | $k_4$    | $k_{14}$ | $\delta_4$ | $\delta_8$ | $\delta_6$ | $\delta_9$ | $\delta_{11}$ | <i>dummy</i> |
| -0.0063  | -0.0087       | -0.1826*  | -0.1938* | 0.0067   | 0.0049   | 0.0589   | 0.0252     | -0.0348    | 0.0031     | 0.0470     | -0.0255       | -0.0390      |
| -0.2141* | 0.2555*       | -0.5394*  | 0.8418*  | -0.5091* | 0.1987*  | -0.0787  | -0.0577    | 0.0266     | -0.0157    | -0.0328    | -0.0012       | -0.0739      |
| -0.1739* | 0.5272*       | -0.4131*  | 0.6594*  | -0.4778* | 0.1530*  | -0.0670  | -0.0586    | 0.0565     | -0.0610    | -0.0139    | 0.0052        | -0.0930      |
| MDC      |               |           |          |          |          |          |            |            |            |            |               |              |
|          | =             |           |          |          |          |          |            |            |            |            |               |              |
| $\xi$    | $\delta_{10}$ | $s_{IDC}$ | $k_2$    | $k_3$    | $k_4$    | $k_{14}$ | $\delta_4$ | $\delta_8$ | $\delta_6$ | $\delta_9$ | $\delta_{11}$ | <i>dummy</i> |
| -0.0265  | 0.9693*       | 0.7188*   | -0.5094* | -0.0271  | 0.0439   | -0.0405  | 0.0404     | -0.0148    | -0.0232    | 0.0125     | -0.0560       | -0.0322      |
| -0.0444  | 0.3627*       | 0.7366*   | 0.5786*  | -0.0175  | 0.0615   | -0.0162  | 0.0066     | 0.0102     | -0.0327    | -0.0542    | -0.0343       | 0.0490       |
| -0.1063* | -0.1749*      | 0.5335*   | 0.5132*  | -0.1337* | 0.1263*  | -0.0905  | 0.0063     | 0.0162     | -0.1128*   | -0.0774    | -0.0164       | 0.0310       |
| Th1      |               |           |          |          |          |          |            |            |            |            |               |              |
|          | =             |           |          |          |          |          |            |            |            |            |               |              |
| $\xi$    | $\delta_{10}$ | $s_{IDC}$ | $k_2$    | $k_3$    | $k_4$    | $k_{14}$ | $\delta_4$ | $\delta_8$ | $\delta_6$ | $\delta_9$ | $\delta_{11}$ | <i>dummy</i> |
| 0.8768*  | 0.8927*       | 0.3556*   | 0.4163*  | 0.8309*  | 0.0257   | -0.0245  | 0.1581*    | -0.0438    | -0.0134    | 0.0235     | -0.0368       | -0.0074      |
| 0.5247*  | 0.0368        | 0.1328*   | 0.4271*  | 0.5842*  | -0.1945* | -0.0169  | 0.0760     | -0.0036    | -0.0072    | -0.0289    | -0.0209       | 0.0384       |
| 0.4626*  | -0.1195*      | 0.0637    | 0.0354   | 0.5097*  | -0.1110  | -0.1495* | 0.0650     | 0.0166     | -0.0585    | -0.0547    | -0.0346       | 0.0661       |
| NS=1000  |               |           |          |          |          |          |            |            |            |            |               |              |
| BE       | =             |           |          |          |          |          |            |            |            |            |               |              |
| $\xi$    | $\delta_{10}$ | $s_{IDC}$ | $k_2$    | $k_3$    | $k_4$    | $k_{14}$ | $\delta_4$ | $\delta_8$ | $\delta_6$ | $\delta_9$ | $\delta_{11}$ | <i>dummy</i> |
| -0.0412  | -0.0241       | -0.1127*  | -0.2011* | -0.0329  | 0.0022   | -0.0956* | 0.0129     | 0.0156     | 0.0297     | -0.0224    | -0.0125       | 0.0048       |
| -0.0460  | 0.3066*       | -0.4712*  | 0.8710*  | -0.5564* | 0.2779*  | -0.1088* | 0.0119     | 0.0553     | 0.0351     | -0.0293    | -0.0409       | -0.0548      |
| -0.1133* | 0.5516*       | -0.2826*  | 0.6612*  | -0.4824* | 0.2119*  | -0.1119* | 0.0106     | 0.0819*    | 0.0102     | 0.0079     | 0.0295        | -0.0613      |
| MDC      |               |           |          |          |          |          |            |            |            |            |               |              |
|          | =             |           |          |          |          |          |            |            |            |            |               |              |
| $\xi$    | $\delta_{10}$ | $s_{IDC}$ | $k_2$    | $k_3$    | $k_4$    | $k_{14}$ | $\delta_4$ | $\delta_8$ | $\delta_6$ | $\delta_9$ | $\delta_{11}$ | <i>dummy</i> |
| -0.0316  | 0.9693*       | 0.7344*   | -0.5096* | -0.0129  | -0.0155  | -0.0858* | 0.0004     | 0.0420     | 0.0243     | 0.0255     | 0.0030        | -0.0060      |
| 0.0100   | 0.3811*       | 0.7671*   | 0.5668*  | -0.0875* | 0.0294   | -0.0607  | 0.0351     | 0.0415     | 0.0107     | -0.0914*   | 0.0416        | -0.0335      |
| 0.0030   | -0.1388*      | 0.5765*   | 0.5322*  | -0.1837* | 0.1277*  | -0.0974* | 0.0421     | 0.0628     | 0.0535     | -0.0805    | 0.0576        | -0.0520      |
| Th1      |               |           |          |          |          |          |            |            |            |            |               |              |
|          | =             |           |          |          |          |          |            |            |            |            |               |              |
| $\xi$    | $\delta_{10}$ | $s_{IDC}$ | $k_2$    | $k_3$    | $k_4$    | $k_{14}$ | $\delta_4$ | $\delta_8$ | $\delta_6$ | $\delta_9$ | $\delta_{11}$ | <i>dummy</i> |
| 0.8737*  | 0.8942*       | 0.4219*   | 0.4409*  | 0.8239*  | -0.0368  | -0.1072* | 0.1086*    | 0.0594     | -0.0088    | 0.0352     | 0.0145        | 0.0179       |
| 0.4676*  | 0.0671        | 0.1916*   | 0.3987*  | 0.5462*  | -0.1441* | -0.0582  | 0.0396     | 0.0268     | 0.0130     | -0.0169    | 0.0145        | -0.0049      |
| 0.4496*  | -0.0688       | 0.0930*   | 0.0269   | 0.4974*  | -0.1072* | -0.1484* | 0.0174     | 0.0406     | 0.0305     | -0.0183    | 0.0354        | -0.0542      |

**TOP-DOWN COEFFICIENT OF CONCORDANCE (TDCC) for LHS\PRCC**

*BE*

| <i>N</i> | <b>TDCC</b> |          |          |
|----------|-------------|----------|----------|
|          | t=100       | t=500    | t=1000   |
| 100-200  | 0.2569      | 0.8067** | 0.8818** |
| 200-300  | 0.7295*     | 0.8968** | 0.908**  |
| 300-400  | 0.6209*     | 0.9417** | 0.9697** |
| 400-500  | 0.6526*     | 0.8006** | 0.958**  |
| 500-1000 | 0.6168*     | 0.8567** | 0.9863** |

\*\*:*p*<0.01, \*:*p*<0.05

*MDC*

| <i>N</i> | <b>TDCC</b> |         |          |
|----------|-------------|---------|----------|
|          | t=100       | t=500   | t=1000   |
| 100-200  | 0.5334      | 0.6447* | 0.4984   |
| 200-300  | 0.6987*     | 0.2876  | 0.867*** |
| 300-400  | 0.5949*     | 0.5794  | 0.6866*  |
| 400-500  | 0.6247*     | 0.0354  | 0.6456*  |
| 500-1000 | 0.7381*     | 0.7*    | 0.7658*  |

\*\*:*p*<0.01, \*:*p*<0.05

*Th1*

| <i>N</i> | <b>TDCC</b> |          |          |
|----------|-------------|----------|----------|
|          | t=100       | t=500    | t=1000   |
| 100-200  | 0.7551*     | 0.5521** | 0.304    |
| 200-300  | 0.5981*     | 0.6749*  | 0.5083   |
| 300-400  | 0.3981      | 0.7219*  | 0.3853   |
| 400-500  | 0.3296      | 0.7219*  | 0.3853   |
| 500-1000 | 0.4317      | 0.8854** | 0.8487** |

\*\*:*p*<0.01, \*:*p*<0.05

*Supplement E.3: Two compartmental model: eFAST results*

Extracellular Bacteria – BE [N<sub>S</sub>=65]

Si\_BE\_65

| $\xi$  | $\delta_{10}$ | S <sub>IDC</sub> | k <sub>2</sub> | k <sub>3</sub> | k <sub>4</sub> | k <sub>14</sub> | $\delta_4$ | $\delta_8$ | $\delta_6$ | $\delta_9$ | $\delta_{11}$ | dummy  |
|--------|---------------|------------------|----------------|----------------|----------------|-----------------|------------|------------|------------|------------|---------------|--------|
| 0.0038 | 0.0067*       | 0.0044           | 0.3244*        | 0.0057         | 0.0034         | 0.0053          | 0.0064*    | 0.0033     | 0.0051     | 0.0034     | 0.0060        | 0.0026 |
| 0.0895 | 0.0265        | 0.0460           | 0.0585*        | 0.0513         | 0.0572         | 0.2289*         | 0.0103     | 0.0051     | 0.0051     | 0.0069     | 0.0080        | 0.0098 |
| 0.0880 | 0.0513        | 0.0652*          | 0.0661*        | 0.1561*        | 0.0574         | 0.1071*         | 0.0097     | 0.0041     | 0.0075     | 0.0108     | 0.0125        | 0.0047 |

CVsi\_BE\_65

| $\xi$    | $\delta_{10}$ | S <sub>IDC</sub> | k <sub>2</sub> | k <sub>3</sub> | k <sub>4</sub> | k <sub>14</sub> | $\delta_4$ | $\delta_8$ | $\delta_6$ | $\delta_9$ | $\delta_{11}$ | dummy    |
|----------|---------------|------------------|----------------|----------------|----------------|-----------------|------------|------------|------------|------------|---------------|----------|
| 86.8628  | 38.3861       | 63.8279          | 6.0697         | 91.9956        | 96.7852        | 77.9249         | 36.2095    | 90.4711    | 44.6985    | 48.5835    | 80.9546       | 53.7108  |
| 100.3436 | 49.1524       | 51.3573          | 45.4020        | 60.0721        | 72.5628        | 17.8410         | 105.5258   | 188.2265   | 100.8178   | 119.0568   | 64.7040       | 77.6912  |
| 90.4884  | 88.2778       | 30.7078          | 46.0177        | 49.7105        | 78.5018        | 41.0348         | 143.7117   | 168.7495   | 129.8468   | 80.9908    | 139.7135      | 123.5859 |

Sti\_BE\_65

| $\xi$  | $\delta_{10}$ | S <sub>IDC</sub> | k <sub>2</sub> | k <sub>3</sub> | k <sub>4</sub> | k <sub>14</sub> | $\delta_4$ | $\delta_8$ | $\delta_6$ | $\delta_9$ | $\delta_{11}$ | dummy  |
|--------|---------------|------------------|----------------|----------------|----------------|-----------------|------------|------------|------------|------------|---------------|--------|
| 0.6966 | 0.6979        | 0.6684           | 0.9924*        | 0.6532         | 0.6502         | 0.6679          | 0.6813     | 0.6812     | 0.6932     | 0.6552     | 0.6452        | 0.6570 |
| 0.4895 | 0.3602        | 0.4892           | 0.5421         | 0.4402         | 0.5016         | 0.7138*         | 0.3584     | 0.3394     | 0.3887     | 0.2918     | 0.3850        | 0.3300 |
| 0.5292 | 0.4401        | 0.5130           | 0.5666         | 0.6195         | 0.4450         | 0.5546          | 0.2966     | 0.3311     | 0.3199     | 0.3036     | 0.3296        | 0.2899 |

CVsti\_BE\_65

| $\xi$   | $\delta_{10}$ | S <sub>IDC</sub> | k <sub>2</sub> | k <sub>3</sub> | k <sub>4</sub> | k <sub>14</sub> | $\delta_4$ | $\delta_8$ | $\delta_6$ | $\delta_9$ | $\delta_{11}$ | dummy   |
|---------|---------------|------------------|----------------|----------------|----------------|-----------------|------------|------------|------------|------------|---------------|---------|
| 7.3302  | 3.4523        | 6.0620           | 0.4939         | 4.6133         | 3.9000         | 3.5900          | 3.9193     | 6.3403     | 7.5275     | 6.9258     | 5.0233        | 5.7635  |
| 42.5563 | 25.8821       | 29.7230          | 27.1947        | 26.3716        | 28.4626        | 11.1503         | 32.4773    | 44.1996    | 29.4062    | 22.7306    | 25.6159       | 28.2485 |
| 43.9069 | 40.4246       | 27.7896          | 35.4428        | 17.3258        | 35.7115        | 17.5528         | 52.5841    | 49.0303    | 45.9448    | 39.8224    | 45.1248       | 37.9895 |

Mature Dendritic Cells – MDC [N<sub>S</sub>=65]

Si\_MDC\_65 =

| $\xi$   | $\delta_{10}$ | S <sub>IDC</sub> | k <sub>2</sub> | k <sub>3</sub> | k <sub>4</sub> | k <sub>14</sub> | $\delta_4$ | $\delta_8$ | $\delta_6$ | $\delta_9$ | $\delta_{11}$ | dummy  |
|---------|---------------|------------------|----------------|----------------|----------------|-----------------|------------|------------|------------|------------|---------------|--------|
| 0.1099* | 0.1097*       | 0.0585*          | 0.0431*        | 0.1596*        | 0.0017         | 0.0041          | 0.0029     | 0.0025     | 0.0032     | 0.0030     | 0.0013        | 0.0032 |
| 0.0818* | 0.0083        | 0.0436           | 0.0221         | 0.0354         | 0.0258         | 0.2760*         | 0.0094     | 0.0198     | 0.0133     | 0.0065     | 0.0153        | 0.0202 |
| 0.0917* | 0.0186        | 0.0430           | 0.0244         | 0.0523         | 0.0302         | 0.2642*         | 0.0215     | 0.0328     | 0.0161     | 0.0129     | 0.0180        | 0.0293 |

CVsi\_MDC\_65 =

| $\xi$    | $\delta_{10}$ | S <sub>IDC</sub> | k <sub>2</sub> | k <sub>3</sub> | k <sub>4</sub> | k <sub>14</sub> | $\delta_4$ | $\delta_8$ | $\delta_6$ | $\delta_9$ | $\delta_{11}$ | dummy   |
|----------|---------------|------------------|----------------|----------------|----------------|-----------------|------------|------------|------------|------------|---------------|---------|
| 140.8227 | 18.0515       | 34.6070          | 9.5636         | 148.8631       | 49.9253        | 95.3691         | 80.6727    | 148.9018   | 66.9880    | 122.7160   | 66.3718       | 45.7464 |
| 74.7551  | 152.9174      | 18.4005          | 48.1771        | 122.2057       | 131.3604       | 15.8268         | 80.3923    | 94.1299    | 89.4211    | 96.0603    | 70.4982       | 89.7999 |
| 77.0756  | 120.9874      | 18.6690          | 27.4835        | 130.6108       | 125.4884       | 13.7963         | 69.3100    | 94.2891    | 87.4892    | 80.4512    | 101.5912      | 67.5134 |

Sti\_MDC\_65 =

| $\xi$   | $\delta_{10}$ | S <sub>IDC</sub> | k <sub>2</sub> | k <sub>3</sub> | k <sub>4</sub> | k <sub>14</sub> | $\delta_4$ | $\delta_8$ | $\delta_6$ | $\delta_9$ | $\delta_{11}$ | dummy  |
|---------|---------------|------------------|----------------|----------------|----------------|-----------------|------------|------------|------------|------------|---------------|--------|
| 0.7020  | 0.6689        | 0.5494           | 0.5468         | 0.7255         | 0.4841         | 0.4749          | 0.5452     | 0.5065     | 0.4791     | 0.5014     | 0.4573        | 0.6384 |
| 0.6080* | 0.3872        | 0.4990           | 0.4732         | 0.5106         | 0.4600         | 0.8318*         | 0.3532     | 0.4300     | 0.4146     | 0.4302     | 0.3989        | 0.4613 |
| 0.5906  | 0.4078        | 0.4845           | 0.4627         | 0.4921         | 0.4855         | 0.8067          | 0.4081     | 0.4775     | 0.4496     | 0.4171     | 0.4160        | 0.4939 |

CVsti\_MDC\_65 =

| $\xi$   | $\delta_{10}$ | S <sub>IDC</sub> | k <sub>2</sub> | k <sub>3</sub> | k <sub>4</sub> | k <sub>14</sub> | $\delta_4$ | $\delta_8$ | $\delta_6$ | $\delta_9$ | $\delta_{11}$ | dummy   |
|---------|---------------|------------------|----------------|----------------|----------------|-----------------|------------|------------|------------|------------|---------------|---------|
| 28.2544 | 11.0587       | 20.4799          | 9.1491         | 14.6956        | 21.2334        | 21.1512         | 28.6563    | 20.0182    | 17.4426    | 27.1018    | 18.9809       | 22.3807 |
| 8.3302  | 13.0828       | 5.3871           | 9.9565         | 25.5803        | 19.3074        | 4.6418          | 8.2433     | 13.7049    | 13.6389    | 10.1435    | 12.7780       | 8.4518  |
| 8.0963  | 24.1285       | 4.8032           | 7.5875         | 27.6128        | 19.3176        | 4.6295          | 10.4173    | 13.6230    | 13.2465    | 8.3126     | 20.4179       | 7.9913  |

T Helper cells type I – Th1 [N<sub>S</sub>=65]

Si\_TH1\_65 =

| $\xi$  | $\delta_{10}$ | S <sub>IDC</sub> | k <sub>2</sub> | k <sub>3</sub> | k <sub>4</sub> | k <sub>14</sub> | $\delta_4$ | $\delta_8$ | $\delta_6$ | $\delta_9$ | $\delta_{11}$ | dummy  |
|--------|---------------|------------------|----------------|----------------|----------------|-----------------|------------|------------|------------|------------|---------------|--------|
| 0.0055 | 0.1358*       | 0.0976*          | 0.2056*        | 0.0029         | 0.0007         | 0.0027          | 0.0061     | 0.0048     | 0.0017     | 0.0026     | 0.0009        | 0.0011 |
| 0.0102 | 0.0052        | 0.1113*          | 0.0100         | 0.0259         | 0.0044         | 0.3187*         | 0.0049     | 0.0035     | 0.0088     | 0.0065     | 0.0025        | 0.0071 |
| 0.0142 | 0.0456        | 0.1045*          | 0.0216         | 0.0273         | 0.0069         | 0.3227*         | 0.0093     | 0.0065     | 0.0129     | 0.0094     | 0.0079        | 0.0125 |



T Helper cells type I – Th1 [N<sub>s</sub>=129]

Si\_TH1\_129 =

| $\xi$  | $\delta_{10}$ | S <sub>IDC</sub> | k <sub>2</sub> | k <sub>3</sub> | k <sub>4</sub> | k <sub>14</sub> | $\delta_4$ | $\delta_8$ | $\delta_6$ | $\delta_9$ | $\delta_{11}$ | dummy  |
|--------|---------------|------------------|----------------|----------------|----------------|-----------------|------------|------------|------------|------------|---------------|--------|
| 0.0008 | 0.1248*       | 0.1070*          | 0.2073*        | 0.0014         | 0.0010         | 0.0014          | 0.0012     | 0.0008     | 0.0013     | 0.0012     | 0.0016        | 0.0014 |
| 0.0082 | 0.0032        | 0.1134*          | 0.0069         | 0.0183         | 0.0011         | 0.3074*         | 0.0016     | 0.0009     | 0.0033     | 0.0025     | 0.0026        | 0.0028 |
| 0.0215 | 0.0434        | 0.1036*          | 0.0147         | 0.0168         | 0.0020         | 0.3283*         | 0.0032     | 0.0020     | 0.0082     | 0.0042     | 0.0043        | 0.0039 |

CVsi\_TH1\_129 =

| $\xi$   | $\delta_{10}$ | S <sub>IDC</sub> | k <sub>2</sub> | k <sub>3</sub> | k <sub>4</sub> | k <sub>14</sub> | $\delta_4$ | $\delta_8$ | $\delta_6$ | $\delta_9$ | $\delta_{11}$ | dummy   |
|---------|---------------|------------------|----------------|----------------|----------------|-----------------|------------|------------|------------|------------|---------------|---------|
| 15.1347 | 12.7960       | 31.4362          | 27.3040        | 7.3869         | 80.1214        | 71.9512         | 69.4527    | 93.3157    | 83.1985    | 71.1344    | 60.7786       | 81.4784 |
| 19.4860 | 90.8395       | 29.1228          | 90.1381        | 56.4234        | 58.5268        | 9.5870          | 80.8807    | 93.6591    | 62.5016    | 40.8374    | 52.7626       | 80.2078 |
| 16.7164 | 87.5921       | 28.7937          | 47.4236        | 30.3210        | 68.1802        | 11.3491         | 58.3934    | 58.2101    | 66.9167    | 72.3731    | 71.4664       | 28.9149 |

Sti\_TH1\_129=

| $\xi$  | $\delta_{10}$ | S <sub>IDC</sub> | k <sub>2</sub> | k <sub>3</sub> | k <sub>4</sub> | k <sub>14</sub> | $\delta_4$ | $\delta_8$ | $\delta_6$ | $\delta_9$ | $\delta_{11}$ | dummy  |
|--------|---------------|------------------|----------------|----------------|----------------|-----------------|------------|------------|------------|------------|---------------|--------|
| 0.4724 | 0.6343*       | 0.6347*          | 0.7409*        | 0.4650         | 0.4558         | 0.5004          | 0.4910     | 0.5851*    | 0.4687     | 0.4677     | 0.4285        | 0.5069 |
| 0.4759 | 0.5048        | 0.6530*          | 0.4791         | 0.5126         | 0.4539         | 0.8484*         | 0.4399     | 0.4374     | 0.4671     | 0.4300     | 0.4588        | 0.4805 |
| 0.5303 | 0.6984        | 0.6518*          | 0.4923         | 0.5083         | 0.4397         | 0.8603*         | 0.4327     | 0.4232     | 0.4845     | 0.4277     | 0.4453        | 0.4699 |

CVsti\_TH1\_129 =

| $\xi$   | $\delta_{10}$ | S <sub>IDC</sub> | k <sub>2</sub> | k <sub>3</sub> | k <sub>4</sub> | k <sub>14</sub> | $\delta_4$ | $\delta_8$ | $\delta_6$ | $\delta_9$ | $\delta_{11}$ | dummy   |
|---------|---------------|------------------|----------------|----------------|----------------|-----------------|------------|------------|------------|------------|---------------|---------|
| 11.6624 | 10.5610       | 7.4554           | 19.7504        | 6.1796         | 19.5978        | 11.3739         | 15.5800    | 16.2055    | 10.2638    | 3.4555     | 16.0248       | 19.0006 |
| 5.8117  | 20.7312       | 8.2141           | 18.8029        | 21.3050        | 25.7691        | 5.0402          | 10.5850    | 13.6532    | 12.6350    | 26.6565    | 8.0826        | 14.4674 |
| 9.1898  | 15.3408       | 10.7155          | 17.4915        | 14.0927        | 20.7839        | 3.8248          | 17.7457    | 15.3558    | 18.6097    | 26.7293    | 12.9438       | 16.6652 |

Extracellular Bacteria – BE [N<sub>s</sub>=257]

Si\_BE\_257 =

| $\xi$   | $\delta_{10}$ | S <sub>IDC</sub> | k <sub>2</sub> | k <sub>3</sub> | k <sub>4</sub> | k <sub>14</sub> | $\delta_4$ | $\delta_8$ | $\delta_6$ | $\delta_9$ | $\delta_{11}$ | dummy  |
|---------|---------------|------------------|----------------|----------------|----------------|-----------------|------------|------------|------------|------------|---------------|--------|
| 0.0025  | 0.0023        | 0.0038*          | 0.3283*        | 0.0025         | 0.0025         | 0.0031          | 0.0022     | 0.0024     | 0.0024     | 0.0024     | 0.0024        | 0.0022 |
| 0.0473* | 0.0070*       | 0.0231*          | 0.0360*        | 0.0673*        | 0.0138*        | 0.3179*         | 0.0021     | 0.0015     | 0.0007     | 0.0013     | 0.0025        | 0.0021 |
| 0.0236  | 0.0165*       | 0.0371*          | 0.0330*        | 0.1752*        | 0.0181*        | 0.1250*         | 0.0017     | 0.0020     | 0.0006     | 0.0006     | 0.0019        | 0.0046 |

CVsi\_BE\_257 =

| $\xi$   | $\delta_{10}$ | S <sub>IDC</sub> | k <sub>2</sub> | k <sub>3</sub> | k <sub>4</sub> | k <sub>14</sub> | $\delta_4$ | $\delta_8$ | $\delta_6$ | $\delta_9$ | $\delta_{11}$ | dummy   |
|---------|---------------|------------------|----------------|----------------|----------------|-----------------|------------|------------|------------|------------|---------------|---------|
| 18.1510 | 19.1695       | 24.8259          | 1.1347         | 17.4597        | 9.4464         | 15.1906         | 5.8681     | 14.9833    | 18.9544    | 11.1743    | 7.0221        | 13.3638 |
| 25.1515 | 53.5338       | 31.3204          | 21.1334        | 51.9089        | 34.6328        | 11.2448         | 89.2002    | 46.6025    | 91.7668    | 122.3768   | 42.7518       | 32.7818 |
| 89.4831 | 55.0413       | 63.2962          | 43.4050        | 38.1521        | 50.5633        | 31.7924         | 149.7740   | 109.8429   | 86.9036    | 105.0679   | 104.2631      | 69.9682 |

Sti\_BE\_257 =

| $\xi$   | $\delta_{10}$ | S <sub>IDC</sub> | k <sub>2</sub> | k <sub>3</sub> | k <sub>4</sub> | k <sub>14</sub> | $\delta_4$ | $\delta_8$ | $\delta_6$ | $\delta_9$ | $\delta_{11}$ | dummy  |
|---------|---------------|------------------|----------------|----------------|----------------|-----------------|------------|------------|------------|------------|---------------|--------|
| 0.6602  | 0.6652        | 0.6669           | 0.9930*        | 0.6569         | 0.6605         | 0.6611          | 0.6526     | 0.6588     | 0.6652     | 0.6605     | 0.6569        | 0.6552 |
| 0.4302* | 0.3148        | 0.3390           | 0.4048*        | 0.4423*        | 0.3515         | 0.7636*         | 0.3118     | 0.3466     | 0.2637     | 0.2761     | 0.3208        | 0.3307 |
| 0.3198  | 0.2838        | 0.3364           | 0.3547         | 0.6694*        | 0.2537         | 0.5411*         | 0.2520     | 0.2774     | 0.1882     | 0.2068     | 0.2356        | 0.3518 |

CVsti\_BE\_257 =

| $\xi$   | $\delta_{10}$ | S <sub>IDC</sub> | k <sub>2</sub> | k <sub>3</sub> | k <sub>4</sub> | k <sub>14</sub> | $\delta_4$ | $\delta_8$ | $\delta_6$ | $\delta_9$ | $\delta_{11}$ | dummy   |
|---------|---------------|------------------|----------------|----------------|----------------|-----------------|------------|------------|------------|------------|---------------|---------|
| 0.6900  | 0.4750        | 2.2779           | 0.1909         | 0.7701         | 1.2718         | 1.0400          | 1.1780     | 2.2386     | 0.9957     | 1.0241     | 1.8233        | 1.8169  |
| 8.2341  | 8.9253        | 12.8443          | 5.2754         | 23.7513        | 7.7154         | 7.4213          | 17.8793    | 19.6273    | 14.4308    | 33.1798    | 21.1381       | 17.1012 |
| 40.1390 | 20.8303       | 36.6597          | 29.6766        | 17.3137        | 30.4705        | 15.7334         | 47.1933    | 42.4482    | 35.5814    | 24.2164    | 34.6719       | 22.2617 |

Mature Dendritic Cells – MDC [N<sub>s</sub>=257]

Si\_MDC\_257=

| $\xi$   | $\delta_{10}$ | S <sub>IDC</sub> | k <sub>2</sub> | k <sub>3</sub> | k <sub>4</sub> | k <sub>14</sub> | $\delta_4$ | $\delta_8$ | $\delta_6$ | $\delta_9$ | $\delta_{11}$ | dummy  |
|---------|---------------|------------------|----------------|----------------|----------------|-----------------|------------|------------|------------|------------|---------------|--------|
| 0.0900* | 0.0904*       | 0.0642*          | 0.0442*        | 0.1370*        | 0.0018         | 0.0030          | 0.0016     | 0.0017     | 0.0022     | 0.0017     | 0.0020        | 0.0017 |
| 0.0759* | 0.0017        | 0.0253*          | 0.0117*        | 0.0263*        | 0.0334*        | 0.2512*         | 0.0012     | 0.0021     | 0.0010     | 0.0022     | 0.0021        | 0.0019 |
| 0.0724* | 0.0030        | 0.0264*          | 0.0306*        | 0.0359*        | 0.0337*        | 0.2489*         | 0.0036     | 0.0030     | 0.0022     | 0.0031     | 0.0031        | 0.0020 |











|               |               |                  |                |                |                |                 |            |            |            |            |               |          |  |
|---------------|---------------|------------------|----------------|----------------|----------------|-----------------|------------|------------|------------|------------|---------------|----------|--|
| CVsi_TH1_2049 | =             |                  |                |                |                |                 |            |            |            |            |               |          |  |
| $\xi$         | $\delta_{10}$ | S <sub>IDC</sub> | k <sub>2</sub> | k <sub>3</sub> | k <sub>4</sub> | k <sub>14</sub> | $\delta_4$ | $\delta_8$ | $\delta_6$ | $\delta_9$ | $\delta_{11}$ | dummy    |  |
| 2.9282        | 2.7043        | 9.3585           | 8.7888         | 7.6713         | 58.5010        | 39.3522         | 72.5307    | 87.0483    | 46.9633    | 64.9113    | 86.2110       | 57.5326  |  |
| 3.3498        | 32.7506       | 5.0565           | 17.0554        | 9.5987         | 20.9087        | 2.8226          | 105.7453   | 76.7754    | 83.7016    | 112.6700   | 108.4503      | 66.3897  |  |
| 11.0960       | 53.4468       | 15.7020          | 21.1009        | 11.0417        | 31.2374        | 8.0302          | 65.1240    | 76.9203    | 69.4582    | 63.3900    | 62.5416       | 109.1498 |  |

|              |               |                  |                |                |                |                 |            |            |            |            |               |        |  |
|--------------|---------------|------------------|----------------|----------------|----------------|-----------------|------------|------------|------------|------------|---------------|--------|--|
| Sti_TH1_2049 | =             |                  |                |                |                |                 |            |            |            |            |               |        |  |
| $\xi$        | $\delta_{10}$ | S <sub>IDC</sub> | k <sub>2</sub> | k <sub>3</sub> | k <sub>4</sub> | k <sub>14</sub> | $\delta_4$ | $\delta_8$ | $\delta_6$ | $\delta_9$ | $\delta_{11}$ | dummy  |  |
| 0.3978       | 0.6401*       | 0.5934*          | 0.7372*        | 0.3918         | 0.3964         | 0.4069          | 0.4122*    | 0.4036*    | 0.4073*    | 0.4021     | 0.4011        | 0.3838 |  |
| 0.4253*      | 0.4067        | 0.6265*          | 0.4072         | 0.4211*        | 0.3963         | 0.8477*         | 0.3967     | 0.3886     | 0.3946     | 0.3988     | 0.3879        | 0.3951 |  |
| 0.4130       | 0.4165        | 0.6031*          | 0.4152         | 0.4061         | 0.4165         | 0.8499*         | 0.3932     | 0.3787     | 0.3836     | 0.3877     | 0.3809        | 0.3979 |  |

|                |               |                  |                |                |                |                 |            |            |            |            |               |        |  |
|----------------|---------------|------------------|----------------|----------------|----------------|-----------------|------------|------------|------------|------------|---------------|--------|--|
| CVsti_TH1_2049 | =             |                  |                |                |                |                 |            |            |            |            |               |        |  |
| $\xi$          | $\delta_{10}$ | S <sub>IDC</sub> | k <sub>2</sub> | k <sub>3</sub> | k <sub>4</sub> | k <sub>14</sub> | $\delta_4$ | $\delta_8$ | $\delta_6$ | $\delta_9$ | $\delta_{11}$ | dummy  |  |
| 1.9508         | 1.2924        | 5.8109           | 4.2796         | 4.1493         | 9.9246         | 11.0121         | 7.0165     | 6.8395     | 3.2029     | 7.4468     | 4.4889        | 8.7444 |  |
| 1.8378         | 2.8823        | 2.8607           | 5.9252         | 3.2162         | 4.8053         | 1.2176          | 7.8602     | 4.8343     | 5.8595     | 4.4338     | 3.8853        | 3.6798 |  |
| 3.4297         | 5.6365        | 4.3124           | 7.6887         | 3.7404         | 7.5913         | 2.8652          | 7.3114     | 6.9702     | 7.7754     | 7.4103     | 3.5533        | 7.0    |  |

### TOP-DOWN COEFFICIENT OF CONCORDANCE - TDCC

| N         | BE - S <sub>i</sub> |         |          |
|-----------|---------------------|---------|----------|
|           | TDCC                |         |          |
|           | t=100               | t=500   | t=1000   |
| 65-129    | 0.4929              | 0.6663* | 0.6935*  |
| 129-257   | 0.3113              | 0.7439* | 0.604*   |
| 257-513   | -0.2016             | 0.6505* | 0.8056** |
| 513-1025  | -0.2433             | 0.4904  | 0.901**  |
| 1025-2049 | 0.7276*             | 0.4633  | 0.4820   |

\*\* : p<0.01, \* : p<0.05

| N         | MDC - S <sub>Ti</sub> |         |          |
|-----------|-----------------------|---------|----------|
|           | TDCC                  |         |          |
|           | T=100                 | t=500   | t=1000   |
| 65-129    | 0.0125                | 0.5152  | 0.3109   |
| 129-257   | 0.51                  | 0.7013* | 0.7927** |
| 257-513   | 0.2607                | 0.6167* | 0.2398   |
| 513-1025  | 0.3597                | 0.5067  | 0.9307** |
| 1025-2049 | 0.2708                | 0.5082  | 0.4424   |

\*\* : p<0.01, \* : p<0.05

| N         | BE - S <sub>Ti</sub> |          |          |
|-----------|----------------------|----------|----------|
|           | TDCC                 |          |          |
|           | t=100                | t=500    | t=1000   |
| 65-129    | 0.6164*              | 0.3617   | 0.6643*  |
| 129-257   | -0.0131              | 0.8041** | 0.7313*  |
| 257-513   | -0.0093              | 0.6737*  | 0.2315   |
| 513-1025  | -0.1466              | 0.5101   | 0.8651** |
| 1025-2049 | 0.689*               | 0.4608   | 0.5803   |

\*\* : p<0.01, \* : p<0.05

| N         | Th1 - S <sub>i</sub> |          |          |
|-----------|----------------------|----------|----------|
|           | TDCC                 |          |          |
|           | t=100                | t=500    | t=1000   |
| 65-129    | 0.0711               | 0.6911*  | 0.8467** |
| 129-257   | 0.1506               | 0.6715*  | 0.4657   |
| 257-513   | 0.9122**             | 0.9476** | 0.2794   |
| 513-1025  | 0.1933               | 0.5342   | 0.7736   |
| 1025-2049 | 0.4904               | 0.8637** | 0.5737   |

\*\* : p<0.01, \* : p<0.05

| N         | MDC - S <sub>i</sub> |          |         |
|-----------|----------------------|----------|---------|
|           | TDCC                 |          |         |
|           | t=100                | t=500    | t=1000  |
| 65-129    | 0.5298               | 0.3936   | 0.5483  |
| 129-257   | 0.5937*              | 0.8543** | 0.6643* |
| 257-513   | 0.3296               | 0.7861** | 0.6239* |
| 513-1025  | 0.2045               | 0.6296*  | 0.3586  |
| 1025-2049 | 0.4476               | 0.6138*  | 0.6026* |

\*\* : p<0.01, \* : p<0.05

| N         | Th1 - S <sub>Ti</sub> |         |         |
|-----------|-----------------------|---------|---------|
|           | TDCC                  |         |         |
|           | t=100                 | t=500   | t=1000  |
| 65-129    | 0.3856                | 0.0535  | 0.3989  |
| 129-257   | 0.679*                | 0.4672  | -0.0208 |
| 257-513   | 0.0413                | 0.3495  | 0.1629  |
| 513-1025  | 0.2493                | 0.2959  | 0.4231  |
| 1025-2049 | 0.1544                | 0.6759* | 0.6809* |

\*\* : p<0.01, \* : p<0.05

## Supplement F: The effect of different parameter ranges on US analysis results

The choice of parameter ranges can affect US analysis results. Here we show two examples: the first one is based on the 2 compartmental ODE model of section 4.3. Figure F.1 shows scatter plots (Panel A and B) of the output BT (total bacterial load) versus LHS sampled values of parameter  $k_{14}$  (sampled uniformly between 0.001 and 1). Parameter  $k_{14}$  is varied simultaneously with all the other parameters in Panel B while it is the only one varied in Panel A (the rest of the parameters are set to baseline levels from Table A.1). Panel A shows a nonlinear non-monotonic relationship that is less evident in Panel B. In fact, a significantly strong negative correlation exists between parameter  $k_{14}$  and total bacterial load (PRCC=-0.77,  $p < 1e-100$ ). If we zoom into the region where  $k_{14}$  is non-monotonic (between 0.2 and 0.44, see Panel A), the strong correlation previously observed is almost lost, although still significant (PRCC=-0.15,  $p < 1e-7$ ). Unless the choice of very small ranges for certain parameters is guided by some *a priori* knowledge, the sampling should be performed within the whole set of known and plausible values.

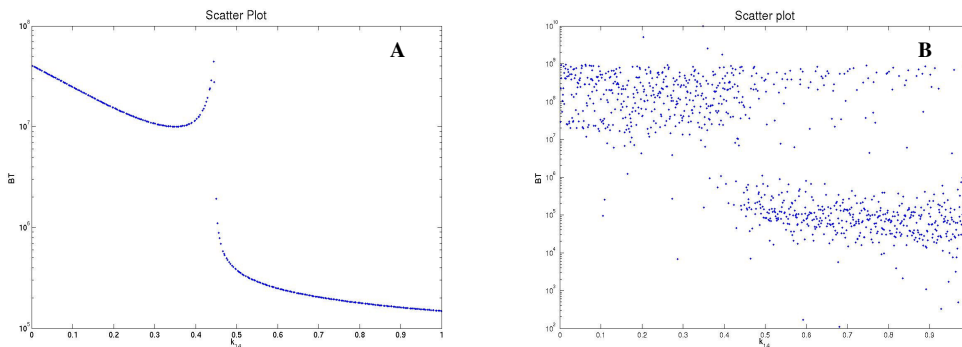

**Figure F.1:** How different LHS ranges can affect PRCC results for the two-compartmental model described in Section 4.3 of the main text and in Supplement E. Scatter plots and PRCC plots of  $k_{14}$  values (x-axis) versus total bacterial load (BT) levels (y-axis) at day 1000. Scatter plots are of raw data in a linear-log scale. The number of runs is equal to 1000, except for Panel A (300 runs). *Panel A:* Scatter plot of the raw data. Only  $k_{14}$  is varied (between  $10^{-3}$  and 1). *Panel B:* Scatter plot of the raw data. All parameters from Table A.1 are varied.  $k_{14}$  is varied between  $10^{-3}$  and 1.

The second example highlights how a completely different range of variation for some parameter can lead to completely different PRCC results. We use the HIV model described in section 4.2, and compare two sets of ranges for  $s$  and  $k_I$ : Set 2 has  $s$  varying in  $[1e^{-4}, 1]$  and  $k_I$  in  $[1e^{-4}, 1e^{-2}]$ , Set 1 has  $s$  varying in  $[1e^{-2}, 50]$  and  $k_I$  varying in  $[1e^{-7}, 1e^{-3}]$  (set 1 is the more biologically plausible according to (Perelson *et al.*, 1993) and it is the one used in section 4.2). The results are shown in Table F.1. Panels A and B show PRCC results for Set 1 and Set 2, respectively. Extended FAST results are shown in Panels C and D for Set 1 and Panels E and F for Set 2.

LHS/PRCC analysis shows how switching from Set 1 to Set 2, parameters  $\mu_T$  loses its significance while parameter  $r$  gains it. Parameters  $N_V$ ,  $\mu_V$ , and  $k_2$  have consistently significant PRCCs for both sets, while  $k_I$ , although still significant, has now a negative PRCC to viral load (-0.1696).

eFAST results seem less affected by changes in parameter ranges. In fact, Panels C and E return the same set of significant  $S_i$  as well as Panels D and F for  $S_{Ti}$ .  $S_{Ti}$  for parameter  $r$  and  $k_I$  in Panel D are only marginally significant ( $p < 0.05$ ): their values are much higher than the dummy but due to large coefficients of variations (greater than 15%, data not shown), any inference is not reliable. Although a larger  $N_S$  is needed to improve accuracy, eFAST results are relatively consistent between the two sets.

**Table F.1:** PRCC and eFAST results on the HIV model for two different set of ranges for the parameters: Set 1 and Set 2 (Set 2 is the more biologically plausible one). Free virus V is always the output and the time points tested are 2000 and 4000 hours. *Panel A:* PRCC for set 1 (NS=300). *Panel B:* PRCC for Set 2 (NS=300). *Panel C:* First order sensitivity index  $S_i$  for Set 1 ( $N_S=257$ ,  $N_R=5$ ). *Panel D:* Total order sensitivity index  $S_{Ti}$  for Set 1 ( $N_S=129$ ,  $N_R=5$ ). *Panel E:* First order sensitivity index  $S_i$  for Set 2 ( $N_S=2049$ ,  $N_R=5$ ). *Panel F:* Total order sensitivity index  $S_{Ti}$  for Set 2 ( $N_S=257$ ,  $N_R=5$ ) [( $*$ ): significant; i.e.,  $p<0.01$ ].

| <i>time</i> | <i>s</i> | $\mu_T$  | <i>r</i> | $k_1$   | $k_2$   | $\mu_b$ | $N_V$   | $\mu_V$  | <i>dummy</i> |
|-------------|----------|----------|----------|---------|---------|---------|---------|----------|--------------|
| 2000        | 0.0778   | -0.3282* | 0.0297   | 0.3815* | 0.6702* | -0.0177 | 0.6763* | -0.6464* | 0.0101       |
| 4000        | 0.0692   | -0.3248* | 0.0322   | 0.3865* | 0.6739* | -0.0042 | 0.6824* | -0.6474* | 0.0148       |

**Panel A: PRCC on Set 1.**

| <i>time</i> | <i>s</i> | $\mu_T$ | <i>r</i> | $k_1$    | $k_2$   | $\mu_b$ | $N_V$   | $\mu_V$  | <i>dummy</i> |
|-------------|----------|---------|----------|----------|---------|---------|---------|----------|--------------|
| 2000        | 0.0265   | -0.0744 | 0.4616*  | -0.1696* | 0.7045* | -0.1121 | 0.6880* | -0.6591* | -0.0056      |
| 4000        | 0.0315   | -0.0576 | 0.4666*  | -0.1704* | 0.6993* | -0.0997 | 0.6929* | -0.6579* | -0.0098      |

**Panel B: PRCC on Set 2**

| <i>s</i> | <i>s</i> | $\mu_T$ | <i>r</i> | $k_1$   | $k_2$   | $\mu_b$ | $N_V$   | $\mu_V$ | <i>dummy</i> |
|----------|----------|---------|----------|---------|---------|---------|---------|---------|--------------|
| 2000     | 0.0073   | 0.0221  | 0.0348*  | 0.0445* | 0.0830* | 0.0033  | 0.0963* | 0.1875* | 0.0099       |
| 4000     | 0.0073   | 0.0221  | 0.0321*  | 0.0448* | 0.0837* | 0.0035  | 0.0940* | 0.1884* | 0.0103       |

**Panel C:  $S_i$  on Set 1.**

| <i>time</i> | <i>s</i> | $\mu_T$ | <i>r</i> | $k_1$   | $k_2$   | $\mu_b$ | $N_V$   | $\mu_V$ | <i>dummy</i> |
|-------------|----------|---------|----------|---------|---------|---------|---------|---------|--------------|
| 2000        | 0.4274   | 0.4781  | 0.5301*  | 0.6611* | 0.5965* | 0.4913  | 0.6274* | 0.7491* | 0.4180       |
| 4000        | 0.4209   | 0.4761  | 0.5090*  | 0.6603* | 0.5984* | 0.4979  | 0.6149* | 0.7503* | 0.4200       |

**Panel D:  $S_{Ti}$  on Set 1.**

| <i>time</i> | <i>s</i> | $\mu_T$ | <i>r</i> | $k_1$   | $k_2$   | $\mu_b$ | $N$     | $\mu_V$ | <i>dummy</i> |
|-------------|----------|---------|----------|---------|---------|---------|---------|---------|--------------|
| 2000        | 0.0150   | 0.0142  | 0.0284*  | 0.0242* | 0.0753* | 0.0229* | 0.0776* | 0.3232* | 0.0184       |
| 4000        | 0.0150   | 0.0142  | 0.0284*  | 0.0240* | 0.0753* | 0.0229* | 0.0776* | 0.3232* | 0.0184       |

**Panel E:  $S_i$ , Set 2.**

| <i>time</i> | <i>s</i> | $\mu_T$ | <i>r</i> | $k_1$  | $k_2$   | $\mu_b$ | $N$     | $\mu_V$ | <i>dummy</i> |
|-------------|----------|---------|----------|--------|---------|---------|---------|---------|--------------|
| 2000        | 0.3969   | 0.3747  | 0.4872   | 0.4493 | 0.5579* | 0.4569  | 0.5734* | 0.8480* | 0.4222       |
| 4000        | 0.3969   | 0.3747  | 0.4872   | 0.4482 | 0.5579* | 0.4569  | 0.5736* | 0.8480* | 0.4224       |

**Panel F:  $S_{Ti}$ , Set 2.**

## Supplement G: Delay Differential Equation model of immune response

**Table G.1**

**Table G.1:** initial conditions (cells or bacteria per  $\text{cm}^3$  of tissue), parameter definitions and values for the DDE model

| <b>Initial Conditions</b>        |                                         |              |
|----------------------------------|-----------------------------------------|--------------|
| <i>Variable</i>                  | <i>Description</i>                      | <i>Value</i> |
| $X_U(0) = X_U^{\text{baseline}}$ | Initial condition for uninfected cells  | $1e^4$       |
| $X_I(0) = X_I^{\text{baseline}}$ | Initial condition for infected cells    | 0            |
| $B(0) = B_0$                     | Initial condition for bacteria          | 20           |
| $I_R(0) = I_R^{\text{baseline}}$ | Initial condition for innate response   | $1e^3$       |
| $A_R(0) = A_R^{\text{baseline}}$ | Initial condition for adaptive response | $1e^2$       |

  

| <b>Parameters</b> |                                                                       |                       |
|-------------------|-----------------------------------------------------------------------|-----------------------|
| <i>Parameter</i>  | <i>Description</i>                                                    | <i>Range</i>          |
| $\mu_{X_U}$       | Half-life of $X_U$ (like macrophages)                                 | 0.011                 |
| $\alpha_1$        | Rate of infection                                                     | $[1e^{-4} - 1e^{-2}]$ |
| $\alpha_2$        | Rate of killing of $X_I$ due to $A_R$                                 | $[1e^{-4} - 1e^{-2}]$ |
| $\mu_{X_I}$       | Half-life of $X_I$                                                    | 0.011                 |
| $\alpha_{20}$     | Growth rate of B                                                      | $[1e^{-1} - 1]$       |
| $\sigma$          | Max # of bacteria (threshold)                                         | $[1e^3 - 1e^6]$       |
| $\alpha_3$        | Rate of killing of B due to $I_R$                                     | $[1e^{-5} - 1e^{-3}]$ |
| $\alpha_4$        | Rate of killing of B due to $A_R$                                     | $[1e^{-6} - 1e^{-3}]$ |
| $\mu_{I_R}$       | Half-life of innate immunity cells (10-fold higher than $\mu_{X_U}$ ) | 0.11                  |
| $\mu_{A_R}$       | Half-life of adaptive immunity cells (T Helper cells)                 | 0.3333                |
| $\tau_1$          | Delay of innate immunity                                              | $[1e^{-2}, 10]$       |
| $\tau_2$          | Delay of adaptive immunity                                            | $[1e^{-1}, 40]$       |



**Table G.2:** PRCC and eFAST results of the delay differential equation model (20)-(24) at five different time points [10 30 50 100 200]. [(\*): significant; i.e.,  $p < 0.01$ ]. The output chosen for SA is bacterial load. Sample size for LHS/PRCC is  $N=1000$ . For eFAST,  $N_S=65$  and  $N_R=20$ . *Panel A:* PRCC calculated using the entire LHS matrix. *Panel B:* PRCC calculated using the subset of the LHS matrix not satisfying condition (25) (see main text, section 4.4). *Panel C:* PRCC calculated using the subset of the LHS matrix satisfying condition (25) (see main text, section 4.4). *Panel D:* First-order eFAST sensitivity indexes. *Panel E:* Total-order eFAST sensitivity indexes.

| time | $\tau_1$ | $\tau_2$ | $\alpha_1$ | $\alpha_2$ | $\alpha_3$ | $\alpha_4$ | $\alpha_{20}$ | $\sigma$ | dummy   |
|------|----------|----------|------------|------------|------------|------------|---------------|----------|---------|
| 10   | -0.0196  | -0.0523  | 0.0623     | -0.0001    | -0.9808*   | -0.5072*   | 0.9716*       | 0.0176   | -0.0078 |
| 30   | -0.2331* | -0.1034  | 0.0489     | 0.0182     | -0.6153*   | -0.1238    | 0.4335*       | 0.0634   | -0.0393 |
| 50   | -0.2226* | -0.1753* | 0.0677     | 0.0324     | -0.7730*   | -0.1881*   | 0.6737*       | 0.0396   | -0.0440 |
| 100  | -0.1680* | -0.1268  | 0.0711     | 0.0279     | -0.8247*   | -0.2030*   | 0.7436*       | 0.0802   | -0.0574 |
| 200  | -0.1844* | -0.0904  | 0.0499     | 0.0006     | -0.8195*   | -0.1767*   | 0.7311*       | 0.0672   | -0.0517 |

**Panel A:** PRCC on the entire LHS matrix

| time | $\tau_1$ | $\tau_2$ | $\alpha_1$ | $\alpha_2$ | $\alpha_3$ | $\alpha_4$ | $\alpha_{20}$ | $\sigma$ | dummy   |
|------|----------|----------|------------|------------|------------|------------|---------------|----------|---------|
| 10   | -0.0302  | 0.0027   | 0.0454     | -0.0787    | -0.8506*   | -0.2965*   | 0.8117*       | 0.0197   | -0.0254 |
| 30   | -0.0314  | -0.0266  | 0.0435     | -0.0808    | -0.8485*   | -0.2856*   | 0.8137*       | 0.0161   | -0.0284 |
| 50   | -0.0149  | -0.0173  | 0.0445     | -0.0775    | -0.8456*   | -0.2678*   | 0.8166*       | 0.0188   | -0.0238 |
| 100  | 0.0037   | -0.0027  | 0.0431     | -0.0766    | -0.8436*   | -0.2503*   | 0.8199*       | 0.0181   | -0.0272 |
| 200  | 0.0089   | 0.0078   | 0.0431     | -0.0779    | -0.8434*   | -0.2398*   | 0.8215*       | 0.0167   | -0.0269 |

**Panel B:** PRCC on the LHS subset not satisfying condition (25)

| time | $\tau_1$ | $\tau_2$ | $\alpha_1$ | $\alpha_2$ | $\alpha_3$ | $\alpha_4$ | $\alpha_{20}$ | $\sigma$ | dummy   |
|------|----------|----------|------------|------------|------------|------------|---------------|----------|---------|
| 10   | 0.0066   | -0.0490  | 0.0467     | -0.0115    | -0.8899*   | -0.4329*   | 0.8691*       | -0.0316  | -0.0019 |
| 30   | -0.4205* | -0.2811* | 0.0494     | 0.0202     | 0.1144*    | -0.1105    | -0.3152*      | 0.0340   | 0.0452  |
| 50   | -0.3615* | -0.3283* | 0.1024     | 0.0187     | -0.3008*   | -0.1972*   | 0.1823*       | -0.0310  | 0.0673  |
| 100  | -0.2627* | -0.2577* | 0.0853     | 0.0214     | -0.3096*   | -0.2099*   | 0.1898*       | 0.0454   | 0.0420  |
| 200  | -0.2877* | -0.2288* | 0.0628     | 0.0013     | -0.2815*   | -0.1650*   | 0.1283*       | 0.0197   | 0.0239  |

**Panel C:** PRCC on the LHS subset satisfying condition (25)

| time | $\tau_1$ | $\tau_2$ | $\alpha_1$ | $\alpha_2$ | $\alpha_3$ | $\alpha_4$ | $\alpha_{20}$ | $\sigma$ | dummy  |
|------|----------|----------|------------|------------|------------|------------|---------------|----------|--------|
| 10   | 0.0279*  | 0.0484*  | 0.0228     | 0.0112     | 0.2877*    | 0.0583*    | 0.1523*       | 0.0221   | 0.0165 |
| 30   | 0.0733*  | 0.1157*  | 0.0600     | 0.0484     | 0.2045*    | 0.0850     | 0.1004*       | 0.0519   | 0.0376 |
| 50   | 0.1173*  | 0.0983*  | 0.1202     | 0.0978     | 0.1478*    | 0.0818*    | 0.1366*       | 0.0668   | 0.0792 |
| 100  | 0.1134*  | 0.0992   | 0.0967     | 0.1139     | 0.1904*    | 0.0974     | 0.1274*       | 0.1178   | 0.0895 |
| 200  | 0.1227   | 0.1234   | 0.1131     | 0.1042     | 0.1613*    | 0.0872     | 0.1142*       | 0.0892   | 0.0916 |

**Panel D:** first-order sensitivity index  $S_i$

| time | $\tau_1$ | $\tau_2$ | $\alpha_1$ | $\alpha_2$ | $\alpha_3$ | $\alpha_4$ | $\alpha_{20}$ | $\sigma$ | dummy  |
|------|----------|----------|------------|------------|------------|------------|---------------|----------|--------|
| 10   | 0.2103*  | 0.3826*  | 0.2089     | 0.1150     | 0.8409*    | 0.3955*    | 0.6485*       | 0.2033   | 0.1678 |
| 30   | 0.5437*  | 0.6839*  | 0.4734     | 0.3980     | 0.8727*    | 0.6393     | 0.7365*       | 0.4178   | 0.3191 |
| 50   | 0.8218*  | 0.6931*  | 0.8050     | 0.7129     | 0.8694*    | 0.5811*    | 0.7133*       | 0.5210   | 0.5895 |
| 100  | 0.8037*  | 0.7628   | 0.7179     | 0.7033     | 0.8817*    | 0.6675*    | 0.7451*       | 0.8272   | 0.6959 |
| 200  | 0.7817   | 0.8584   | 0.7783     | 0.7824     | 0.8863*    | 0.6620     | 0.7181*       | 0.7004   | 0.6568 |

**Panel E:** total-order sensitivity index  $S_{Ti}$

**Table G.3: detailed eFAST results on the delay model in section 4.4 of the manuscript.**

**S<sub>i</sub>, NS=65, NR=5**

| time | $\tau_1$ | $\tau_2$ | $\alpha_1$ | $\alpha_2$ | $\alpha_3$ | $\alpha_4$ | $\alpha_{20}$ | $\sigma$ | dummy  |
|------|----------|----------|------------|------------|------------|------------|---------------|----------|--------|
| 10   | 0.0193   | 0.0155   | 0.0132     | 0.0079     | 0.1984*    | 0.0414     | 0.1723*       | 0.0220   | 0.0090 |
| 30   | 0.0443   | 0.1458   | 0.0533     | 0.0270     | 0.2866*    | 0.1000*    | 0.1146        | 0.0515   | 0.0372 |
| 50   | 0.1008   | 0.1487   | 0.0977     | 0.0456     | 0.1586*    | 0.0886*    | 0.1133*       | 0.0880   | 0.0182 |
| 100  | 0.0966   | 0.1100   | 0.0779     | 0.0993     | 0.1315*    | 0.1345     | 0.1299*       | 0.1201   | 0.0658 |
| 200  | 0.0852   | 0.0958   | 0.0992     | 0.0992     | 0.2730*    | 0.1018     | 0.1113        | 0.1053   | 0.0926 |

**CV<sub>s<sub>i</sub></sub>**

| time | $\tau_1$ | $\tau_2$ | $\alpha_1$ | $\alpha_2$ | $\alpha_3$ | $\alpha_4$ | $\alpha_{20}$ | $\sigma$ | dummy    |
|------|----------|----------|------------|------------|------------|------------|---------------|----------|----------|
| 10   | 144.2654 | 125.2001 | 95.1143    | 111.8739   | 68.8894    | 58.1539    | 96.5936       | 143.9488 | 152.0000 |
| 30   | 53.2870  | 149.5556 | 122.5190   | 124.0243   | 100.5846   | 104.8757   | 127.1269      | 142.8619 | 83.9657  |
| 50   | 168.5867 | 141.1228 | 152.0239   | 103.8887   | 81.2937    | 102.2800   | 87.9667       | 156.6263 | 58.1359  |
| 100  | 133.8536 | 111.3795 | 102.2914   | 192.1373   | 76.9156    | 111.3086   | 97.1914       | 139.8560 | 126.5793 |
| 200  | 154.6319 | 135.1095 | 143.2305   | 141.8523   | 90.3385    | 96.2441    | 96.8879       | 99.0502  | 138.2250 |

**S<sub>Ti</sub>, NS=65, NR=5**

| time | $\tau_1$ | $\tau_2$ | $\alpha_1$ | $\alpha_2$ | $\alpha_3$ | $\alpha_4$ | $\alpha_{20}$ | $\sigma$ | dummy  |
|------|----------|----------|------------|------------|------------|------------|---------------|----------|--------|
| 10   | 0.1553   | 0.1447   | 0.1246     | 0.0880     | 0.8630*    | 0.3267     | 0.6261*       | 0.1849   | 0.0833 |
| 30   | 0.3413   | 0.8676   | 0.4198     | 0.2481     | 0.8840*    | 0.6482*    | 0.7960*       | 0.4128   | 0.2873 |
| 50   | 0.7265   | 0.7656   | 0.7471     | 0.3695     | 0.8453*    | 0.6560*    | 0.7613*       | 0.6410   | 0.1835 |
| 100  | 0.7230   | 0.8396   | 0.5391     | 0.7290     | 0.8704*    | 0.8044     | 0.8068*       | 0.8238   | 0.5120 |
| 200  | 0.7551   | 0.7569   | 0.5721     | 0.7509     | 0.7872*    | 0.7006     | 0.7293        | 0.7494   | 0.8023 |

**CV<sub>S<sub>Ti</sub></sub>**

| time | $\tau_1$ | $\tau_2$ | $\alpha_1$ | $\alpha_2$ | $\alpha_3$ | $\alpha_4$ | $\alpha_{20}$ | $\sigma$ | dummy    |
|------|----------|----------|------------|------------|------------|------------|---------------|----------|----------|
| 10   | 168.9324 | 131.5928 | 97.1150    | 114.7382   | 108.0382   | 128.5753   | 100.0953      | 134.1547 | 142.8055 |
| 30   | 82.2733  | 139.3402 | 128.1334   | 106.8218   | 100.0881   | 136.5247   | 104.9496      | 124.9635 | 86.8417  |
| 50   | 178.4657 | 130.9297 | 151.3264   | 108.3445   | 100.6122   | 112.9897   | 103.9011      | 149.7184 | 59.3725  |
| 100  | 136.3796 | 119.0967 | 98.7360    | 180.9233   | 101.4618   | 135.9653   | 104.9138      | 132.2905 | 125.8226 |
| 200  | 158.5934 | 123.7234 | 116.8643   | 138.8972   | 99.8849    | 111.0587   | 97.7849       | 113.2401 | 141.9040 |

**S<sub>i</sub>, NS=65, NR=20**

| time | $\tau_1$ | $\tau_2$ | $\alpha_1$ | $\alpha_2$ | $\alpha_3$ | $\alpha_4$ | $\alpha_{20}$ | $\sigma$ | dummy  |
|------|----------|----------|------------|------------|------------|------------|---------------|----------|--------|
| 10   | 0.0279*  | 0.0484*  | 0.0228     | 0.0112     | 0.2877*    | 0.0583*    | 0.1523*       | 0.0221   | 0.0165 |
| 30   | 0.0733*  | 0.1157*  | 0.0600     | 0.0484     | 0.2045*    | 0.0850     | 0.1004*       | 0.0519   | 0.0376 |
| 50   | 0.1173*  | 0.0983*  | 0.1202     | 0.0978     | 0.1478*    | 0.0818*    | 0.1366*       | 0.0668   | 0.0792 |
| 100  | 0.1134*  | 0.0992   | 0.0967     | 0.1139     | 0.1904*    | 0.0974     | 0.1274*       | 0.1178   | 0.0895 |
| 200  | 0.1227   | 0.1234   | 0.1131     | 0.1042     | 0.1613*    | 0.0872     | 0.1142*       | 0.0892   | 0.0916 |

**CV<sub>s<sub>i</sub></sub>**

| time | $\tau_1$ | $\tau_2$ | $\alpha_1$ | $\alpha_2$ | $\alpha_3$ | $\alpha_4$ | $\alpha_{20}$ | $\sigma$ | dummy    |
|------|----------|----------|------------|------------|------------|------------|---------------|----------|----------|
| 10   | 123.5034 | 194.8934 | 186.1062   | 138.6807   | 85.2739    | 83.7584    | 86.4593       | 214.2552 | 176.1004 |
| 30   | 72.2393  | 118.3395 | 138.5375   | 124.2849   | 79.0369    | 147.3545   | 130.4251      | 120.1901 | 96.3386  |
| 50   | 123.1391 | 133.4148 | 220.6788   | 217.9033   | 62.3055    | 104.8393   | 107.6511      | 135.6042 | 188.8654 |
| 100  | 131.0480 | 134.6358 | 170.6628   | 192.1874   | 77.5074    | 128.2992   | 97.0451       | 253.5032 | 156.1838 |
| 200  | 141.8747 | 142.2387 | 152.2826   | 168.8486   | 62.1730    | 103.0352   | 90.0777       | 168.6053 | 124.5279 |

**S<sub>Ti</sub>, NS=65, NR=20**

| time | $\tau_1$ | $\tau_2$ | $\alpha_1$ | $\alpha_2$ | $\alpha_3$ | $\alpha_4$ | $\alpha_{20}$ | $\sigma$ | dummy  |
|------|----------|----------|------------|------------|------------|------------|---------------|----------|--------|
| 10   | 0.2103*  | 0.3826*  | 0.2089     | 0.1150     | 0.8409*    | 0.3955*    | 0.6485*       | 0.2033   | 0.1678 |
| 30   | 0.5437*  | 0.6839*  | 0.4734     | 0.3980     | 0.8727*    | 0.6393     | 0.7365*       | 0.4178   | 0.3191 |
| 50   | 0.8218*  | 0.6931*  | 0.8050     | 0.7129     | 0.8694*    | 0.5811*    | 0.7133*       | 0.5210   | 0.5895 |
| 100  | 0.8037*  | 0.7628   | 0.7179     | 0.7033     | 0.8817*    | 0.6675*    | 0.7451*       | 0.8272   | 0.6959 |
| 200  | 0.7817   | 0.8584   | 0.7783     | 0.7824     | 0.8863*    | 0.6620     | 0.7181*       | 0.7004   | 0.6568 |

**CV<sub>S<sub>Ti</sub></sub>**

| time | $\tau_1$ | $\tau_2$ | $\alpha_1$ | $\alpha_2$ | $\alpha_3$ | $\alpha_4$ | $\alpha_{20}$ | $\sigma$ | dummy    |
|------|----------|----------|------------|------------|------------|------------|---------------|----------|----------|
| 10   | 137.9708 | 207.2900 | 180.5670   | 141.3824   | 101.9384   | 138.9739   | 102.3148      | 192.9522 | 179.9271 |
| 30   | 113.1428 | 125.2775 | 139.8100   | 126.1887   | 99.9394    | 152.2993   | 112.9639      | 122.7075 | 102.6616 |
| 50   | 132.7011 | 131.7841 | 205.7701   | 203.9145   | 104.7785   | 117.8112   | 107.0298      | 138.9706 | 185.9341 |
| 100  | 135.1186 | 133.9035 | 166.2474   | 164.3342   | 99.8418    | 132.3673   | 106.5909      | 220.3176 | 150.8193 |
| 200  | 130.5880 | 142.0687 | 149.9027   | 164.9461   | 100.8980   | 116.6368   | 99.1134       | 166.0701 | 131.6336 |

**S<sub>i</sub>, NS=129, NR=5**

| time | $\tau_1$ | $\tau_2$ | $\alpha_1$ | $\alpha_2$ | $\alpha_3$ | $\alpha_4$ | $\alpha_{20}$ | $\sigma$ | dummy  |
|------|----------|----------|------------|------------|------------|------------|---------------|----------|--------|
| 10   | 0.0041   | 0.0098   | 0.0023     | 0.0014     | 0.3218*    | 0.0275     | 0.1038*       | 0.0028   | 0.0122 |
| 30   | 0.0593   | 0.0975   | 0.0169     | 0.0215     | 0.1980*    | 0.0493     | 0.0532*       | 0.0278   | 0.0062 |
| 50   | 0.0544   | 0.0438   | 0.0412     | 0.0310     | 0.1997*    | 0.0345     | 0.0566        | 0.0174   | 0.0393 |
| 100  | 0.0410   | 0.0546   | 0.0287     | 0.0426     | 0.1340*    | 0.0505     | 0.0589        | 0.0415   | 0.0383 |
| 200  | 0.0497   | 0.0424   | 0.0516     | 0.0221     | 0.2126*    | 0.0544*    | 0.0806*       | 0.0638   | 0.0231 |

**CV<sub>S<sub>i</sub></sub>**

| time | $\tau_1$ | $\tau_2$ | $\alpha_1$ | $\alpha_2$ | $\alpha_3$ | $\alpha_4$ | $\alpha_{20}$ | $\sigma$ | dummy    |
|------|----------|----------|------------|------------|------------|------------|---------------|----------|----------|
| 10   | 71.2365  | 145.8554 | 173.0452   | 123.9713   | 91.4324    | 35.9810    | 83.8815       | 114.1534 | 346.8012 |
| 30   | 187.7353 | 158.6901 | 206.8257   | 157.5746   | 89.0176    | 124.9555   | 102.9165      | 258.8308 | 121.4591 |
| 50   | 178.5905 | 116.1862 | 212.6679   | 153.0807   | 99.2300    | 73.4102    | 133.4740      | 75.3306  | 186.2718 |
| 100  | 122.7088 | 106.2554 | 111.3175   | 130.5122   | 65.7280    | 100.4312   | 112.5976      | 115.4544 | 158.9387 |
| 200  | 192.1068 | 114.7978 | 135.3213   | 77.1318    | 89.2582    | 88.3393    | 106.7728      | 151.2681 | 125.4024 |

**S<sub>Ti</sub>, NS=129, NR=5**

| time | $\tau_1$ | $\tau_2$ | $\alpha_1$ | $\alpha_2$ | $\alpha_3$ | $\alpha_4$ | $\alpha_{20}$ | $\sigma$ | dummy  |
|------|----------|----------|------------|------------|------------|------------|---------------|----------|--------|
| 10   | 0.0798   | 0.1196   | 0.0545     | 0.0814     | 0.8446*    | 0.2605     | 0.6402*       | 0.0588   | 0.2164 |
| 30   | 0.6579   | 0.8326*  | 0.3021     | 0.4127     | 0.8845*    | 0.6275     | 0.7922*       | 0.4227   | 0.1123 |
| 50   | 0.7329   | 0.6094   | 0.5589     | 0.4036     | 0.8440*    | 0.4904     | 0.6441        | 0.3892   | 0.6198 |
| 100  | 0.6001   | 0.7224   | 0.4829     | 0.7218     | 0.8868*    | 0.7709     | 0.6248*       | 0.6512   | 0.5546 |
| 200  | 0.7933   | 0.7079   | 0.7207     | 0.4903     | 0.8559*    | 0.7350     | 0.8030*       | 0.7662   | 0.3532 |

**CV<sub>S<sub>Ti</sub></sub>**

| time | $\tau_1$ | $\tau_2$ | $\alpha_1$ | $\alpha_2$ | $\alpha_3$ | $\alpha_4$ | $\alpha_{20}$ | $\sigma$ | dummy    |
|------|----------|----------|------------|------------|------------|------------|---------------|----------|----------|
| 10   | 128.5294 | 146.3572 | 162.5094   | 191.1825   | 102.0818   | 82.3899    | 99.8350       | 119.7284 | 280.6353 |
| 30   | 194.1368 | 138.5858 | 185.5372   | 157.9181   | 99.5853    | 134.8921   | 102.4297      | 204.8226 | 90.2079  |
| 50   | 185.5236 | 124.9957 | 177.0138   | 135.2357   | 100.6843   | 82.6950    | 97.2470       | 100.5041 | 165.2885 |
| 100  | 155.8439 | 121.0368 | 114.4024   | 147.5088   | 101.2867   | 112.7190   | 91.1713       | 121.1986 | 150.2241 |
| 200  | 207.1623 | 120.5593 | 138.2513   | 95.9509    | 101.5652   | 98.9193    | 107.9415      | 123.3462 | 114.7024 |

**S<sub>i</sub>, NS=257, NR=5**

| time | $\tau_1$ | $\tau_2$ | $\alpha_1$ | $\alpha_2$ | $\alpha_3$ | $\alpha_4$ | $\alpha_{20}$ | $\sigma$ | dummy  |
|------|----------|----------|------------|------------|------------|------------|---------------|----------|--------|
| 10   | 0.0104*  | 0.0011   | 0.0003     | 0.0004     | 0.2301*    | 0.0212*    | 0.0977*       | 0.0001   | 0.0022 |
| 30   | 0.0136   | 0.0450   | 0.0029     | 0.0035     | 0.1642*    | 0.0228     | 0.0390        | 0.0017   | 0.0093 |
| 50   | 0.0280*  | 0.0257   | 0.0024     | 0.0287     | 0.0842*    | 0.0229     | 0.0581*       | 0.0022   | 0.0124 |
| 100  | 0.0373   | 0.0283   | 0.0162     | 0.0243     | 0.0857*    | 0.0324     | 0.0339        | 0.0135   | 0.0251 |
| 200  | 0.0161   | 0.0202   | 0.0224     | 0.0240     | 0.1471*    | 0.0303*    | 0.0300        | 0.0300   | 0.0174 |

**CV<sub>si</sub>**

| time | $\tau_1$ | $\tau_2$ | $\alpha_1$ | $\alpha_2$ | $\alpha_3$ | $\alpha_4$ | $\alpha_{20}$ | $\sigma$ | dummy    |
|------|----------|----------|------------|------------|------------|------------|---------------|----------|----------|
| 10   | 86.3487  | 27.3484  | 80.5021    | 290.2131   | 87.5709    | 85.5194    | 85.0168       | 103.8637 | 213.0735 |
| 30   | 97.0851  | 127.0033 | 44.8454    | 59.2454    | 78.1014    | 130.0295   | 66.0919       | 228.9163 | 177.2243 |
| 50   | 84.9230  | 67.3211  | 40.1802    | 307.2208   | 72.7816    | 93.6995    | 90.7535       | 141.2189 | 100.6158 |
| 100  | 95.2407  | 108.7243 | 99.3350    | 147.7580   | 73.2456    | 108.0513   | 71.0819       | 113.1675 | 157.6277 |
| 200  | 88.0191  | 86.1555  | 114.4780   | 177.7660   | 89.3528    | 85.1934    | 72.8476       | 139.2297 | 103.5820 |

**S<sub>Ti</sub>, NS=257, NR=5**

| time | $\tau_1$ | $\tau_2$ | $\alpha_1$ | $\alpha_2$ | $\alpha_3$ | $\alpha_4$ | $\alpha_{20}$ | $\sigma$ | dummy  |
|------|----------|----------|------------|------------|------------|------------|---------------|----------|--------|
| 10   | 0.0855*  | 0.0666   | 0.0131     | 0.0294     | 0.8468*    | 0.2886*    | 0.6696*       | 0.0024   | 0.0947 |
| 30   | 0.2044   | 0.4146   | 0.1262     | 0.2335     | 0.8654*    | 0.4172     | 0.7630*       | 0.0979   | 0.3334 |
| 50   | 0.5472*  | 0.6230   | 0.1354     | 0.7427     | 0.8642*    | 0.5633     | 0.7016*       | 0.1274   | 0.5306 |
| 100  | 0.5350   | 0.7781   | 0.5180     | 0.5925     | 0.8790*    | 0.6554     | 0.8633        | 0.4570   | 0.7366 |
| 200  | 0.4122   | 0.6197   | 0.7607     | 0.7843     | 0.8654*    | 0.7980*    | 0.8649        | 0.6367   | 0.6476 |

**CV<sub>STi</sub>**

| time | $\tau_1$ | $\tau_2$ | $\alpha_1$ | $\alpha_2$ | $\alpha_3$ | $\alpha_4$ | $\alpha_{20}$ | $\sigma$ | dummy    |
|------|----------|----------|------------|------------|------------|------------|---------------|----------|----------|
| 10   | 94.0727  | 116.4093 | 83.6897    | 266.7391   | 101.8729   | 111.8459   | 101.7834      | 106.6204 | 222.5645 |
| 30   | 131.7662 | 108.6579 | 58.6523    | 85.7069    | 99.2924    | 133.3653   | 98.8405       | 131.6591 | 164.3038 |
| 50   | 93.1519  | 104.9844 | 56.8415    | 245.1413   | 103.0454   | 97.9293    | 97.7897       | 130.0527 | 125.7261 |
| 100  | 96.3868  | 124.5996 | 126.7015   | 153.2688   | 102.0666   | 96.5287    | 104.1681      | 112.4437 | 148.2535 |
| 200  | 82.7744  | 104.1613 | 124.8783   | 163.8216   | 102.0238   | 104.6895   | 109.0801      | 124.7261 | 113.6821 |

## References

- Abdi, H. (2007). Bonferroni and Sidak corrections for multiple comparisons. In *Encyclopedia of Measurement and Statistics* ((ed.), N. J. S., ed.). Sage, Thousand Oaks, CA.
- Benjamini, Y. & Hochberg, Y. (1995). Controlling the False Discovery Rate - a Practical and Powerful Approach to Multiple Testing. *Journal of the Royal Statistical Society Series B-Methodological* **57**(1), 289-300.
- Marino, S. & Kirschner, D. E. (2004). The human immune response to Mycobacterium tuberculosis in lung and lymph node. *J Theor Biol* **227**(4), 463-86.
- Marino, S., Pawar, S., Fuller, C. L., Reinhart, T. A., Flynn, J. L. & Kirschner, D. E. (2004). Dendritic cell trafficking and antigen presentation in the human immune response to Mycobacterium tuberculosis. *J Immunol* **173**(1), 494-506.
- Perelson, A. S., Kirschner, D. E. & De Boer, R. (1993). Dynamics of HIV infection of CD4+ T cells. *Math Biosci* **114**(1), 81-125.
- Saltelli, A., Chan, K. & Scott, E. M. (2000). *Sensitivity analysis*. Wiley series in probability and statistics, Wiley, Chichester ; New York.
- Saltelli, A., Tarantola, S. & Chan, K. P. S. (1999). A quantitative model-independent method for global sensitivity analysis of model output. *Technometrics* **41**(1), 39-56.
- Wigginton, J. E. & Kirschner, D. (2001). A model to predict cell-mediated immune regulatory mechanisms during human infection with Mycobacterium tuberculosis. *J Immunol* **166**(3), 1951-67.
